1           **Modelling the spatial and temporal constrains of the**  
2                           **GABAergic influence on neuronal excitability**

3   **Short title:** Spatial constrains of GABAergic rheobase shift

4

5   **Aniello Lombardi, Heiko J. Luhmann, Werner Kilb**

6   Institute of Physiology, University Medical Center of the Johannes Gutenberg University,  
7   Duesbergweg 6, 55128 Mainz, Germany

8

9   Corresponding author:    wkilb@uni-mainz.de;  
10                                Tel.: +49-211-3926101,  
11                                ORCID: 0000-0001-8204-3984

12

13

14

15 **Abstract:**

16 GABA ( $\gamma$ -amino butyric acid) is an inhibitory neurotransmitter in the adult brain that can mediate  
17 depolarizing responses during development or after neuropathological insults. Under which  
18 conditions GABAergic membrane depolarizations are sufficient to impose excitatory effects is  
19 hard to predict, as shunting inhibition and GABAergic effects on spatiotemporal filtering of  
20 excitatory inputs must be considered. To evaluate at which reversal potential a net excitatory effect  
21 was imposed by GABA ( $E_{GABA}^{Thr}$ ), we performed a detailed in-silico study using simple neuronal  
22 topologies and distinct spatiotemporal relations between GABAergic and glutamatergic inputs.

23 These simulations revealed for GABAergic synapses located at the soma an  $E_{GABA}^{Thr}$  close to  
24 action potential threshold ( $E_{AP}^{Thr}$ ), while with increasing dendritic distance  $E_{GABA}^{Thr}$  shifted to  
25 positive values. The impact of GABA on AMPA-mediated inputs revealed a complex temporal  
26 and spatial dependency.  $E_{GABA}^{Thr}$  depends on the temporal relation between GABA and AMPA  
27 inputs, with a striking negative shift in  $E_{GABA}^{Thr}$  for AMPA inputs appearing after the GABA input.  
28 The spatial dependency between GABA and AMPA inputs revealed a complex profile, with  
29  $E_{GABA}^{Thr}$  being shifted to values negative to  $E_{AP}^{Thr}$  for AMPA synapses located proximally to the  
30 GABA input, while for distally located AMPA synapses the dendritic distance had only a minor  
31 effect on  $E_{GABA}^{Thr}$ . For tonic GABAergic conductances  $E_{GABA}^{Thr}$  was negative to  $E_{AP}^{Thr}$  over a  
32 wide range of  $g_{GABA}^{tonic}$  values. In summary, these results demonstrate that for several  
33 physiologically relevant situations  $E_{GABA}^{Thr}$  is negative to  $E_{AP}^{Thr}$ , suggesting that depolarizing  
34 GABAergic responses can mediate excitatory effects even if  $E_{GABA}$  did not reach  $E_{AP}^{Thr}$ .

35

36 **Author summary:**

37 The neurotransmitter GABA mediates an inhibitory action in the mature brain, while it was found  
38 that GABA provokes depolarizations in the immature brain of after neurological insults. It is,  
39 however, not clear to which extend these GABAergic depolarizations can contribute to an  
40 excitatory effect. In the present manuscript we approached this question with a computational  
41 model of a simplified neurons to determine which amount of a GABAergic depolarizing effect,  
42 which we quantified by the so called GABA reversal potential ( $E_{GABA}$ ), was required to turn  
43 GABAergic inhibition to excitation. The results of our simulations revealed that if GABA was  
44 applied alone a GABAergic excitation was induced when  $E_{GABA}$  was around the action potential  
45 threshold. When GABA was applied together with additional excitatory inputs, which is the  
46 physiological situation in the brain, only for spatially and temporally correlated inputs  $E_{GABA}$  was  
47 close to the action potential threshold. For situations in which the additional excitatory inputs  
48 appear after the GABA input or are distant to the GABA input, an excitatory effect of GABA could  
49 be observed already at  $E_{GABA}$  substantially negative to the action potential threshold. This results  
50 indicate that even slightly depolarizing GABA responses, which may be induced during or after  
51 neurological insults, can potentially turn GABAergic inhibition into GABAergic excitation.

52

## 53 **1. Introduction**

54 The neurotransmitter  $\gamma$ -amino butyric acid (GABA) is the major inhibitory neurotransmitter in the  
55 adult mammalian brain [1]. GABA regulates the excitation of neurons and is thus essential for e.g.  
56 the control of sensory integration, regulation of motor functions, generation of oscillatory activity,  
57 and neuronal plasticity [2–4]. GABA mediates its effects via metabotropic GABA<sub>B</sub> receptors [5]  
58 and ionotropic GABA<sub>A</sub> receptors, ligand-gated anion-channels with a high Cl<sup>-</sup> permeability and a  
59 partial HCO<sub>3</sub><sup>-</sup> permeability [6]. The membrane responses caused by GABA<sub>A</sub> receptor activation  
60 thus depend on the reversal potential of GABA receptors ( $E_{GABA}$ ), which is determined mainly by  
61 the intracellular Cl<sup>-</sup> concentration ( $[Cl^-]_i$ ) and to a lesser extent by the HCO<sub>3</sub><sup>-</sup> gradient across the  
62 membrane [6].

63 About 30 years ago seminal studies demonstrated that GABA<sub>A</sub> receptors can mediate depolarizing  
64 and excitatory actions in the immature central nervous system [7–9]. This depolarizing  
65 GABAergic action reflects differences in the  $[Cl^-]_i$  homeostasis between immature and adult  
66 neurons [10–15]. In particular, low functional expression of a K<sup>+</sup>-Cl<sup>-</sup> cotransporter (KCC2), which  
67 mediates the effective extrusion of Cl<sup>-</sup> and thus establishes the low  $[Cl^-]_i$  required for  
68 hyperpolarizing GABAergic membrane responses [16], prevent hyperpolarizing GABA responses  
69 in the immature brain. In addition, the inwardly directed Cl<sup>-</sup> transporter NKCC1 mediates the  
70 accumulation of Cl<sup>-</sup> above passive distribution that underlies the depolarizing membrane  
71 responses upon activation of GABA<sub>A</sub> receptors [17–21]. These depolarizing GABAergic  
72 membrane responses play a role in several developmental processes [11,22,23], like neuronal  
73 proliferation [24], apoptosis [25], neuronal migration [26], dendro- and synaptogenesis [27],  
74 timing of critical periods [28] and the establishment of neuronal circuitry [29]. Of clinical  
75 importance, an elevated  $[Cl^-]_i$  is also a typical consequence of several neurological disorders in

76 the adult brain, like trauma, stroke or epilepsy and is considered to augment the consequences of  
77 such insults [11,30,31].

78 However, it is important to consider that depolarizing GABA responses do not per se lead to  
79 excitatory effects. In fact, the membrane shunting that unescapably accompanies the activation of  
80 GABA<sub>A</sub> receptors can dominate over the excitatory effects of the membrane depolarization  
81 [11,32–34]. Theoretical considerations [35,36] suggest that the relation between  $E_{GABA}$  and the  
82 action potential threshold ( $E_{AP}^{Thr}$ ) determine whether activation of GABA<sub>A</sub> receptors mediates  
83 excitatory ( $E_{GABA}$  positive to  $E_{Thr}^{AP}$ ) or inhibitory ( $E_{GABA}$  negative to  $E_{Thr}^{AP}$ ) actions. However,  
84 this concept is probably an oversimplification, as within the dendritic compartment the local  
85 activation of GABAergic conductance influences not only the amplitude of local excitatory  
86 synaptic postsynaptic potentials (EPSPs), but also the length and time constants of the dendritic  
87 membrane and thus temporal and spatial summation of excitatory synaptic inputs [37,38].  
88 Moreover, the depolarizing effect of GABAergic stimulation outlasts the conductance increase  
89 associated with GABA<sub>A</sub> receptor activation, resulting in a bimodal GABA effect. Close to the  
90 initiation of GABAergic responses the shunting effect of the enhanced GABAergic conductance  
91 dominate and mediate inhibition. This phase is followed by an excitatory phase dominated by the  
92 GABAergic depolarization [39,40]. In addition,  $E_{Thr}^{AP}$  is a dynamic variable, that depends on the  
93 background conductance and the density and adaptation state of voltage-gated Na<sup>+</sup> channels  
94 [10,41,42]. Experimental studies on the effects of GABAergic inputs on neuronal excitability  
95 demonstrated for immature neocortical neurons that  $E_{GABA}$  required for excitatory GABAergic  
96 responses ( $E_{GABA}^{Thr}$ ) was close to  $E_{AP}^{Thr}$  [43], while in immature hippocampal neurons  $E_{GABA}^{Thr}$   
97 was considerably negative to  $E_{AP}^{Thr}$  [44]. The observations that (i) the GABA effect can switch  
98 from inhibition to excitation for delayed glutamatergic inputs [39], that (ii) GABA inputs in distal  
99 dendrites can facilitate neuronal excitability [40], and that (iii) extrasynaptic GABAergic

100 activation mediates an excitatory effect whereas synaptic inputs mediate inhibition [45], also  
101 suggest that the reversal potential required for GABAergic excitation is not only defined by  $E_{AP}^{Thr}$ .  
102 This complexity is further supported by recent in-vivo investigations that identified excitatory as  
103 well as inhibitory effects of GABA in the immature brain [46–48]. In summary, to our knowledge  
104 no clear concept is currently available that can explain how  $E_{GABA}$  influences GABAergic  
105 excitation/inhibition and the effect of GABA on spatiotemporal summation of EPSPs in the  
106 dendritic compartment.

107 Therefore, the present computational study investigates the dependency between  $E_{GABA}$  and  
108 excitatory and inhibitory consequences of  $GABA_A$  receptor activation and attempts to establish a  
109 general view of the impact of depolarizing GABAergic effects on the excitability of neurons. Our  
110 results demonstrate that only for GABAergic synapses located at or close to the soma the  
111 difference between  $E_{GABA}$  and  $E_{AP}^{Thr}$  predicts whether GABA has an excitatory or an inhibitory  
112 action. The  $E_{GABA}$  at which depolarizing GABA actions switch from inhibition to excitation is in  
113 most cases negative to  $E_{AP}^{Thr}$  and depends on the temporal and spatial relation between GABA  
114 and AMPA inputs, with a more excitatory effect on AMPA inputs that are delayed or located  
115 proximal to GABA inputs. We conclude from our results that GABA can mediate excitatory effects  
116 even if  $E_{GABA}$  is considerably hyperpolarized to  $E_{AP}^{Thr}$ .

## 117 **2. Results**

### 118 **2.1. Simulation of active and passive properties of immature CA3 pyramidal neurons**

119 The parameters used for the models in this study are based on the cellular properties obtained in  
120 whole-cell patch-clamp recordings from visually identified CA3 neurons in horizontal  
121 hippocampal slices from P4-7 mice. Some parameters of these recordings have been used in our  
122 previous report [49]. The analysis of the patch-clamp experiments revealed that the immature CA3  
123 pyramidal neurons had an average resting membrane potential (RMP) of  $-50.5 \pm 1.3$  mV, an  
124 average input resistance ( $R_{Inp}$ ) of  $1.03 \pm 0.11$  GOhm, and an average membrane capacity ( $C_M$ ) of  
125  $132.3 \pm 33.6$  nF (all  $n=42$ ). As the passive membrane properties directly influence synaptic  
126 integration as well as active properties, like  $E_{AP}^{Thr}$  or the shape of the action potential (AP), we  
127 first adapted the spatial properties and the passive conductance  $g_{pas}$  of the ball-and-stick model to  
128 emulate the recorded properties. To obtain sufficient similarity for these parameters between the  
129 model and the real cells we equipped a ball-and-stick model (soma diameter ( $d$ ) = 46.6  $\mu$ m,  
130 dendrite length = 1 mm, dendrite diameter = 1  $\mu$ m) with a passive conductance density ( $g_{pas}$ ) of  
131  $1.28 \cdot 10^{-5}$  nS/cm<sup>2</sup> at a reversal potential ( $E_{pas}$ ) of  $-50.5$  mV. This model had a RMP of  $-50.5$  mV,  
132 a  $R_{Inp}$  of 1.045 GOhm and a  $C_M$  of 144.4 nF. In some experiments we reduced the topology to a  
133 simple ball model (*one node*,  $d = 46.6$   $\mu$ m), without adapting  $g_{pas}$ , to evaluate the impact of GABA  
134 under quasi one-dimensional conditions.

135 With these configurations we next implemented a mechanism that provided APs with properties  
136 comparable to the APs recorded in CA3 pyramidal neuron. In particular, we were interested to  
137 simulate the AP properties around AP initiation as precisely as possible, because for the main  
138 questions of this manuscript we are interested in the  $E_{AP}^{Thr}$ . Since it was not possible to generate a  
139 reasonable sharp AP onset with a standard Hodgkin-Huxley (HH) model, we used a modified

140 Markov model (see materials for details) to simulate AP with a considerable precision (Fig. 1A-  
 141 E).

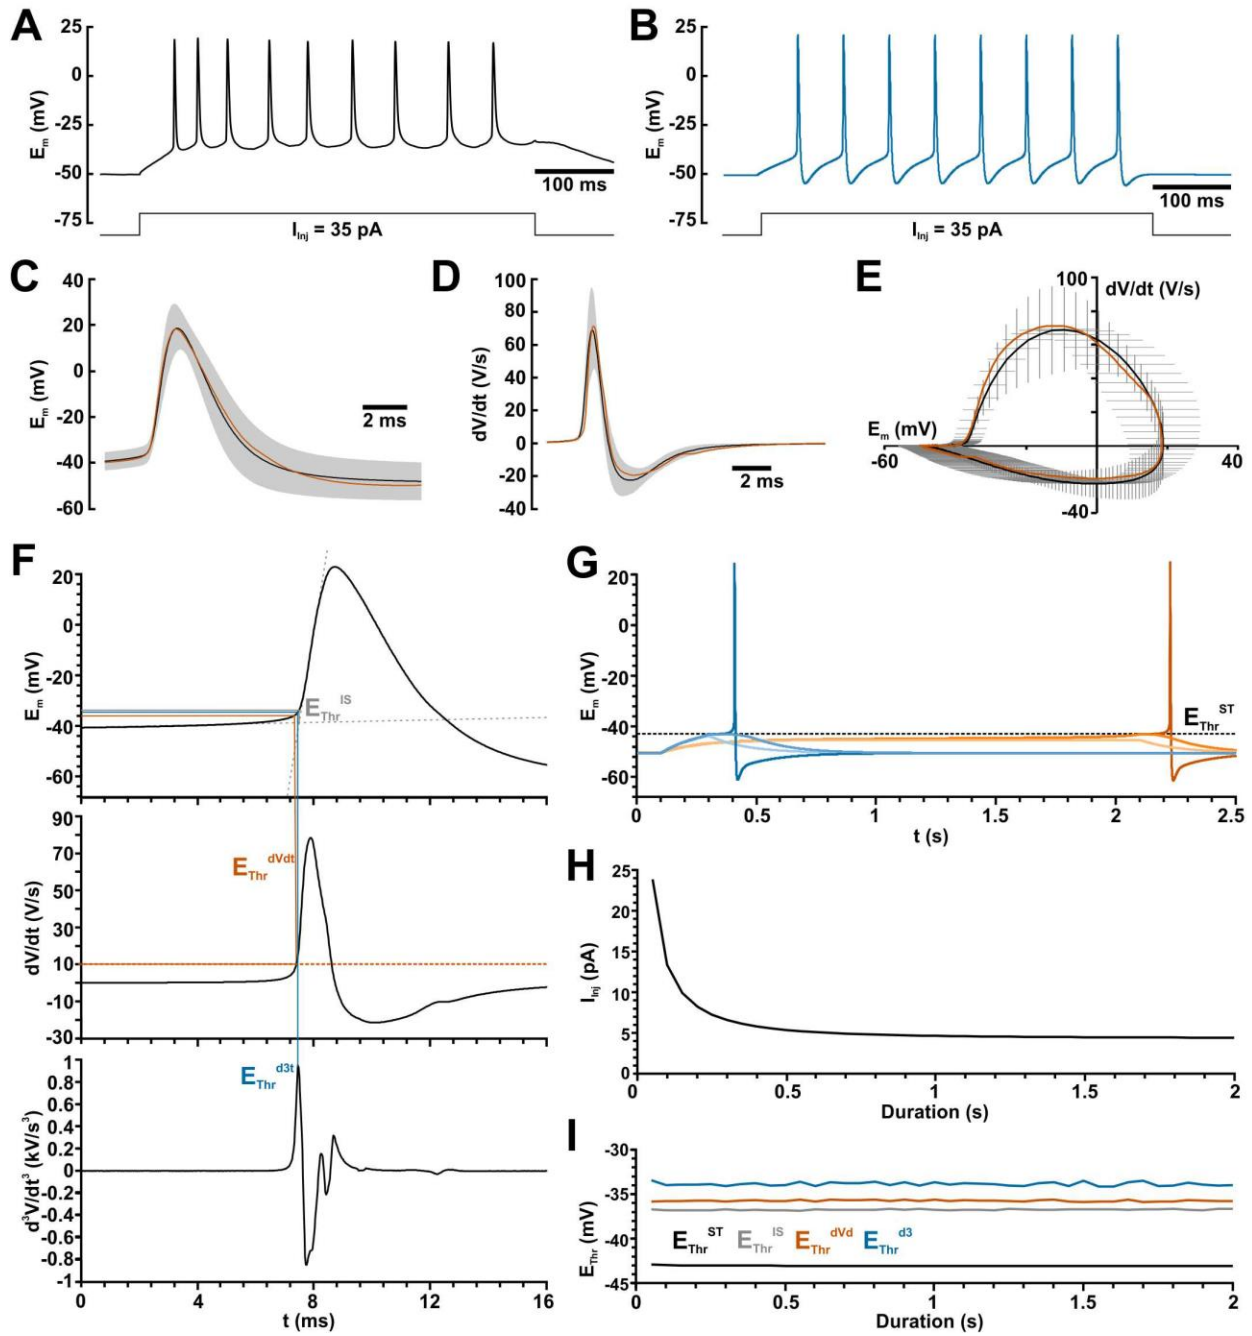

142

143 **Figure 1.** Properties of recorded and simulated action potentials (APs). A: Typical AP train

144 recorded in a CA3 pyramidal neuron upon a current injection of +35 pA. B: AP train simulated

145 in a ball-and-stick model using the modified Markov model. C: Average voltage trace of



146 recorded APs (black line = average; gray area  $\pm$  SEM) and of the simulated AP (orange trace).  
147 D: Discharge rate of recorded (black line, gray area) and simulated AP (orange trace). E:  
148 Phase plane plot of recorded (whiskers = mean  $\pm$  SEM) and simulated AP (orange trace). F:  
149 Determination of the AP threshold from the intersection of linear voltage fits ( $E_{Thr}^{IS}$ , gray lines),  
150 from the time point  $dV/dt$  reaches the 10 V/s threshold ( $E_{Thr}^{dV/dt}$ , orange lines), and from the time  
151 point  $d^3V/dt^3$  reaches the peak value ( $E_{Thr}^{d^3}$ , blue lines). G: Determination of the AP threshold  
152 at maximal potential of a subthreshold depolarization ( $E_{Thr}^{ST}$ , black lines). Blue traces indicate  
153 a 200 ms depolarizing stimulus and orange traces a 2 s stimulus. Dark tones indicate the  
154 smallest suprathreshold stimulus, middle tones the largest subthreshold stimulus and light tones  
155 a clearly subthreshold stimulus. H: Injection current ( $I_{inj}$ ) required to elicit an AP at different  
156 stimulus durations. I: Values of different AP threshold parameters for various stimulation  
157 durations. Note that AP threshold is independent from the stimulation duration.

158 Because the relation between  $E_{AP}^{Thr}$  and  $E_{GABA}$  is one major parameter investigated in this study  
159 and since no clear definition of the AP threshold has been given [42], we initially used 4 different  
160 methods to determine the action potential threshold (Fig. 1F): 1.) The AP threshold value  $E_{Thr}^{dV/dt}$   
161 was defined as the potential at which  $dV/dt$  first crosses a velocity of 10 V/s [44,50] (Fig. 1F  
162 orange lines). 2.)  $E_{Thr}^{d^3}$  was defined as the potential at the time point of the first positive peak in  
163  $d^3V/dt^3$  [51] (Fig. 1F, blue lines). 3.)  $E_{Thr}^{IS}$  was determined at the intersection between linear  
164 regressions of the baseline before the AP and the rising phase of an AP (Fig. 1H) [43] (Fig. 1F,  
165 gray lines). 4.)  $E_{Thr}^{ST}$  was defined as the maximal potential reached at the strongest subthreshold  
166 stimulation (Fig. 1G, dashed line), i.e. the minimal potential that did not lead into the regenerative  
167 Hodgkin cycle. While the rheobase, i.e. the minimal suprathreshold injection current,  
168 demonstrated as expected a hyperbolic increase at shorter stimulus durations and converged to  
169 4.4495 pA (Fig. 1H), the distinct  $E_{AP}^{Thr}$  parameters are virtually independent on the duration of

170 the stimulus (Fig. 1I). In the ball model average  $E_{\text{Thr}}^{\text{dVdt}}$  was  $-35.7$  mV, average  $E_{\text{Thr}}^{\text{d3}}$  was  $-33.8$   
171 mV, average  $E_{\text{Thr}}^{\text{IS}}$  was  $-36.7$  mV, and  $E_{\text{Thr}}^{\text{ST}}$  converged to  $-43.04$  mV (Fig. 1I). When using the  
172 ball-and-stick model the rheobase was slightly larger at  $6.708$  pA,  $E_{\text{Thr}}^{\text{dVdt}}$  was  $-35.7$  mV,  $E_{\text{Thr}}^{\text{d3}}$   
173 was  $-33.8$  mV,  $E_{\text{Thr}}^{\text{IS}}$  was  $-36.6$  mV, and  $E_{\text{Thr}}^{\text{ST}}$  converged to  $-42.71$  mV (data not shown).  
174 Because for the following simulations several hundred sweeps were required for each analyzed  
175 parameter and thus a time-effective simulation was compulsory, we next evaluated the maximal  
176 dt interval required to obtain stable AP responses. This experiment demonstrated that the time  
177 course of AP and  $E_{\text{AP}}^{\text{Thr}}$  determination remained stable until a dt of  $0.1$  ms (Suppl. Fig. 1). Thus  
178 we decided to use a dt of  $0.1$  ms in the following simulations.

179

## 180 ***2.2. Determination of the threshold for excitatory GABAergic responses***

181 To identify the reversal potential at which the GABA response switches from inhibitory to  
182 excitatory, we first determined the GABAergic conductance that was sufficient to trigger an AP,  
183 which was defined as the GABAergic excitation threshold ( $g_{\text{GABA}}^{\text{Thr}}$ ). The value of  $g_{\text{GABA}}^{\text{Thr}}$  was  
184 determined by systematically increasing the conductance of a simulated GABAergic input until an  
185 AP was evoked. To determine this excitation threshold as precisely as possible, we used a multi-  
186 step procedure to incrementally confine the threshold conductance (Fig. 2A). This procedure was  
187 repeated for a whole set of  $E_{\text{GABA}}$  values (Fig. 2B).

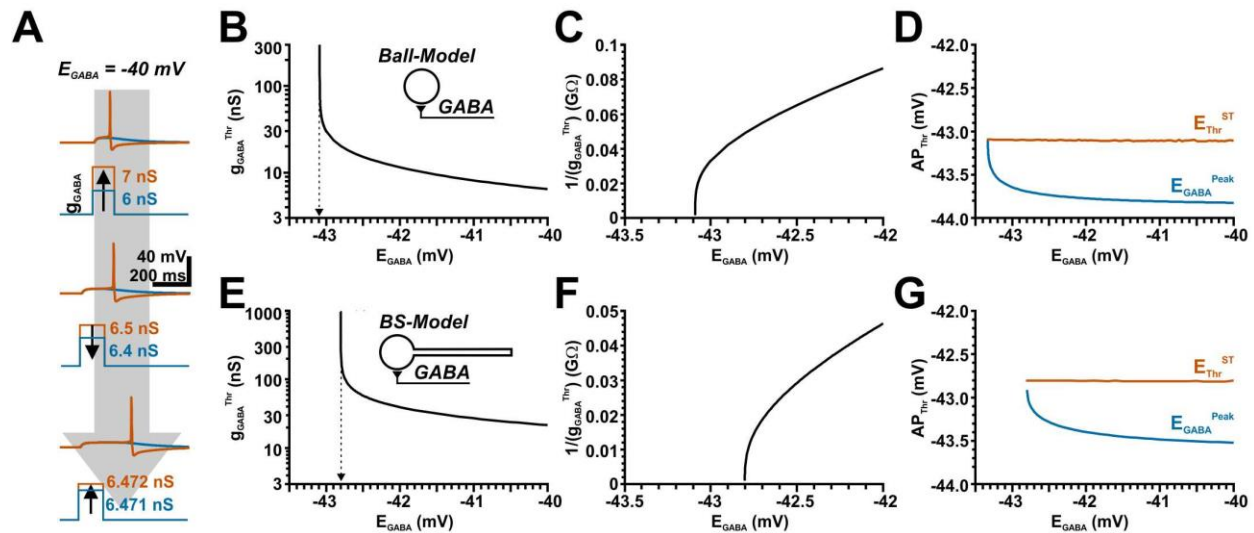

188

189 **Figure 2.** Determination of the threshold conductance at different  $E_{GABA}$  enable the  
 190 identification of  $E_{GABA}$  at which responses switch from inhibitory to excitatory ( $E_{GABA}^{Thr}$ ). A:  
 191 Typical voltage traces illustrating the mechanisms used to determine the threshold  $g_{GABA}$  value.  
 192 For this purpose,  $g_{GABA}$  was increased until the first AP was induced (upper panel), then  
 193 decreased by finer  $g_{GABA}$  steps until the AP disappears (middle panel), followed by a subsequent  
 194 increase in  $g_{GABA}$  with finer  $g_{GABA}$  steps (lower panel). In total, 6 alternating rounds of  
 195 increased/decreased  $g_{GABA}$  steps were used. The  $g_{GABA}$  value required to induce an AP in the  
 196 last increasing step was considered as threshold ( $g_{GABA}^{Thr}$ ). B: Plotting  $g_{GABA}^{Thr}$  versus  $E_{GABA}$   
 197 demonstrate that with decreasing  $E_{GABA}$  higher  $g_{GABA}^{Thr}$  values were required, which  
 198 approximated infinite values. C: A reciprocal plot of  $g_{GABA}^{Thr}$  enables the precise determination  
 199 of  $E_{GABA}^{Thr}$ . At  $E_{GABA}$  values negative to  $E_{GABA}^{Thr}$  no action potential could be induced,  
 200 suggesting a stable GABAergic inhibition. D: The determined AP threshold  $E_{Thr}^{ST}$  (orange line)  
 201 is constant over various  $E_{GABA}$ , whereas the peak potential of the GABAergic depolarization,  
 202 which was determined at  $g_{GABA}^{Thr}$  in absence of AP mechanism ( $E_{GABA}^{Peak}$ , blue line) increases  
 203 with decreasing  $E_{GABA}$ . Note that the values converged in one point when  $E_{GABA}$  reaches  $E_{Thr}^{ST}$ .

204 *E-G: Similar plots for a ball-and-stick model. Note that  $E_{GABA}^{Thr}$  was shifted to less negative*  
205 *values in this configuration.*

206 In the ball model (*one node*,  $d = 46.6 \mu\text{m}$ ) these systematic simulations demonstrated an obvious  
207 hyperbolic increase of  $g_{GABA}^{Thr}$  when  $E_{GABA}$  approaches values below  $-43 \text{ mV}$  (Fig. 2B). The  
208  $g_{GABA}^{Thr}$  curve approximated an  $E_{GABA}$  of  $-43.09 \text{ mV}$ , which was precisely determined from a  
209 reciprocal plot of the  $g_{GABA}^{Thr}$  values (Fig. 2C). Negative to an  $E_{GABA}$  of  $-43.09 \text{ mV}$  no action  
210 potential could be evoked, regardless of the amount of  $g_{GABA}$ . These  $E_{GABA}$  values thus reflect the  
211 threshold, at which GABA actions can mediate a direct excitation and we termed this value  
212 “threshold  $E_{GABA}$ ” ( $E_{GABA}^{Thr}$ ). Note that this value is close to the  $E_{Thr}^{ST}$  value of  $-43.04 \text{ mV}$   
213 determined in the previous experiments. Since  $E_{AP}^{Thr}$  is influenced directly by the total membrane  
214 conductance, we also determined the amplitude of the GABAergic voltage response under  
215 conditions when the AP initiation was blocked ( $E_{GABA}^{Peak}$ ) as well as different  $E_{AP}^{Thr}$  parameters.  
216 These analyses revealed that  $E_{Thr}^{d3}$  was around  $-29 \text{ mV}$  for all  $E_{GABA}$ .  $E_{Thr}^{ST}$  was relatively stable  
217 around  $-43.1 \text{ mV}$ , with a slight positive shift at low  $E_{GABA}$  values that converges to  $-43.09 \text{ mV}$   
218 (Fig. 2D).  $E_{GABA}^{Peak}$  was for higher  $E_{GABA}$  around  $-43.8 \text{ mV}$  and showed a positive shift with  
219 decreasing  $E_{GABA}$  that converged to values of  $-43.1 \text{ mV}$  (Fig. 2D).

220 In summary, these results indicate that GABA acts as excitatory neurotransmitter as long as  $E_{GABA}$   
221 is positive to  $-43.09 \text{ mV}$ , which is extremely close to the AP threshold  $E_{Thr}^{ST}$ . This observation is  
222 in line with previous predictions that propose exactly this relation between  $E_{AP}^{Thr}$  and  $E_{GABA}$   
223 [35,36]. In addition, our simulations suggest that  $E_{Thr}^{ST}$  is probably the most relevant definition for  
224  $E_{AP}^{Thr}$  if the direction of GABA effects should be predicted from the difference between  $E_{GABA}$   
225 and  $E_{AP}^{Thr}$ .

226 Next we performed the same simulation with a ball-and-stick model. These simulations revealed  
227 that the  $g_{GABA}^{Thr}$  curve approximated an  $E_{GABA}$  of  $-42.8$  mV (Fig. 2E-F), which is in the range of  
228 the  $E_{Thr}^{ST}$  ( $-42.71$  mV) determined for the ball-and-stick model.  $E_{Thr}^{d3}$  was around  $-29.8$  mV for  
229 all  $E_{GABA}$ .  $E_{Thr}^{ST}$  was stable at values around  $-42.8$  mV and converges at low  $E_{GABA}$  to  $-42.8$  mV  
230 (Fig. 2G).  $E_{GABA}^{Peak}$  was for higher  $E_{GABA}$  around  $-43.6$  mV and converged with decreasing  $E_{GABA}$   
231 to  $-42.8$  mV (Fig. 2G). Thus,  $E_{GABA}^{Thr}$  for a somatic synapse is still in good agreement with the  
232 AP threshold value  $E_{Thr}^{ST}$  with this slightly more complex neuronal topology.

233 For the next set of experiments, we located a single GABA synapse along the dendrite of the ball-  
234 and-stick model and determined  $E_{GABA}^{Thr}$  for each of these 20 synaptic positions, using the method  
235 described above. The considerable conductance and capacitance provided by the dendritic  
236 membrane leads, as expected, to a reduced amplitude and a slower time course of the GABAergic  
237 PSPs recorded at the dendritic positions (Fig. 3A). Accordingly, larger  $g_{GABA}$  values were required  
238 to trigger APs for more distant dendritic locations of GABAergic inputs (Fig. 3B, C). At the most  
239 distant dendritic positions  $g_{GABA}$  values above 100 nS (i.e. more than 100x of  $g_{GABA}$  of a single  
240 synaptic event [49]) were required to trigger an AP, which virtually clamped the dendritic  
241 membrane at the synapse position to  $E_{GABA}$  (Fig. 3B). A systematic analysis of  $g_{GABA}^{Thr}$  at different  
242  $E_{GABA}$  values illustrated that  $g_{GABA}^{Thr}$  showed a considerable less steep dependency on  $E_{GABA}$  at  
243 more distant dendrite positions (Fig. 3C). The reciprocal plot of  $g_{GABA}^{Thr}$  demonstrated that the  
244  $g_{GABA}^{Thr}$  values did not converge at similar  $E_{GABA}$  values for the different synapse locations, but  
245 that the curves reached the abscissa at considerable more positive values for distant GABAergic  
246 inputs (Fig. 3D). Intriguingly,  $E_{GABA}^{Thr}$  values were close to  $E_{Thr}^{ST}$  for synapses close to the soma,  
247 were shifted to slightly more negative  $E_{GABA}^{Thr}$  values for dendritic synapses at a distance of ca.  
248  $250 \mu\text{m}$ , and increased to more positive  $E_{GABA}^{Thr}$  values with additional distance to the soma (Fig.  
249 3E).  $E_{GABA}^{Peak}$ , which was determined in the absence of AP mechanisms and reflects the effective

250 voltage fluctuation at the soma and thus the AP initiation site, was shifted to negative potentials at  
 251 more distant dendritic positions (Fig. 3G, H), while the position of GABA synapses had no major  
 252 effect on  $E_{Thr}^{ST}$  (Fig. 3F, H). In summary, these simulations revealed that  $E_{GABA}^{Th}$  is not close to  
 253 the AP threshold value  $E_{Thr}^{ST}$  for synapses that are located in the dendrite, but that  $E_{GABA}^{Th}$  is  
 254 shifted to more positive values with increasing distance. This observation suggests that for  
 255 dendritic synapses a more positive  $E_{GABA}$  (corresponding to a higher  $[Cl^-]_i$ ) is required to mediate  
 256 a direct excitatory effect.

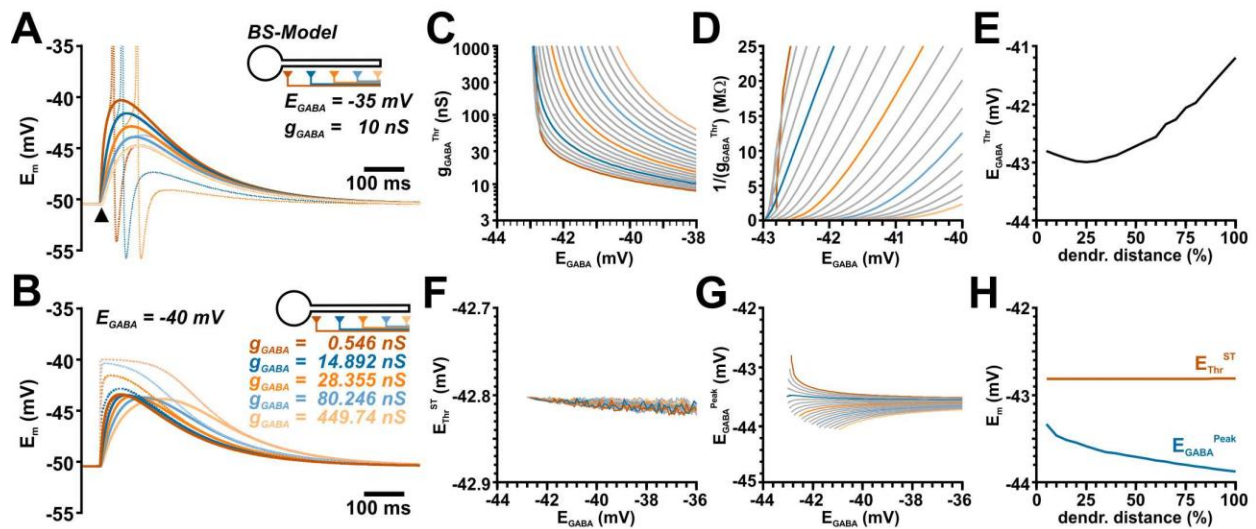

257

258 **Figure 3.** Determination of  $E_{GABA}^{Thr}$  at different dendrite positions. A: Simulated voltage traces  
 259 obtained with the given parameters at different locations as indicated by color code. The dashed  
 260 traces represent simulation with added AP mechanism. The amplitude of GABA responses  
 261 clearly depends on the dendritic location. B: Simulated voltage traces for  $g_{GABA}^{Thr}$  and  $E_{GABA}$  of  
 262  $-40$  mV at the soma (solid trace) and the synaptic site (dashed line). Color codes the different  
 263 synapse locations. For each location different  $g_{GABA}$  (as indicated) had to be used. Note that at  
 264 distant synapses considerable large  $g_{GABA}$  were required, which virtually clamped  $E_m$  at the  
 265 synaptic site to  $E_{GABA}$ . C: Systematic plot of  $g_{GABA}^{Thr}$  determined at various  $E_{GABA}$ . The curves  
 266 were obtained from 20 equidistant positions along the dendrite. The 1<sup>th</sup>, 5<sup>th</sup>, 10<sup>th</sup>, 15<sup>th</sup> and 20<sup>th</sup>  
 267 trace is color-coded as in A for better readability. D: The reciprocal plot of  $g_{GABA}^{Thr}$  revealed  
 268 that the curves did not monotonically approach the abscissa. Therefore,  $E_{GABA}^{Thr}$  was estimated  
 269 from a linear fit to the last two data-points. E:  $E_{GABA}^{Thr}$  showed a considerable shift towards

270 *depolarized potentials with increasing dendritic distance. F: The AP threshold  $E_{Thr}^{ST}$  remained*  
271 *rather stable with different  $E_{GABA}$  or different synaptic location. G: The peak potential*  
272 *( $E_{GABA}^{Peak}$ ) of the somatic GABAergic depolarization at  $g_{GABA}^{Thr}$  converges toward  $E_{Thr}^{ST}$  only*  
273 *for soma-near synapses (dark orange trace). With more distant synapses less depolarized*  
274  *$E_{GABA}^{Peak}$  was required. Color code as in C. H: While the average  $E_{Thr}^{ST}$  (orange line) is stable*  
275 *for all dendritic locations, the average  $E_{GABA}^{Peak}$  (blue line) is shifted to more negative values*  
276 *with increasing dendritic distance.*

277

### 278 **2.3. Effect of phasic GABAergic inputs on glutamatergic excitation**

279 The previous results demonstrated that only at perisomatic synapses  $E_{GABA}^{Thr}$  was reached when  
280  $E_{GABA}$  was at the action potential threshold  $E_{Thr}^{ST}$ , but that  $E_{GABA}^{Thr}$  was systematically shifted to  
281 positive  $E_{GABA}$  at distant synapses in a ball-and-stick model. However, these experiments do not  
282 reflect the physiological situation of GABAergic transmission in the brain. First, the threshold  
283 conductance  $g_{GABA}^{Thr}$  determined by these simulations is above physiological values for moderate  
284 GABAergic inputs [49,52,53] making a direct excitatory GABAergic input implausible. And  
285 second, synaptic activity is characterized by the co-activation of GABA and glutamate receptors  
286 [54–56], with the latter constituting the main excitatory drive [57]. Therefore, we next simulated  
287 the impact of a GABAergic co-stimulation on glutamatergic synaptic inputs and determined the  
288  $g_{AMPA}$  values that were required to trigger an AP. As in the previous experiments, we varied  $E_{GABA}$   
289 to determine  $E_{GABA}^{Thr}$ , which is defined as the  $E_{GABA}$  value at which the GABAergic effect shifts  
290 from inhibitory (i.e. GABA co-activation requires larger  $g_{AMPA}$  to trigger APs) to excitatory action  
291 (i.e. GABA co-activation requires less  $g_{AMPA}$ ) (Fig. 4A). This effect was quantified as the  
292 GABAergic excitability shift ( $\Delta g_{AMPA}^{Thr}$ ), with  $g_{AMPA}^{Thr}$  describing the  $g_{AMPA}$  value sufficient to  
293 trigger an AP, and  $\Delta g_{AMPA}^{Thr}$  defined as difference in  $g_{AMPA}^{Thr}$  between conditions with and  
294 without GABAergic co-stimulation [ $\Delta g_{AMPA}^{Thr} = (g_{AMPA}^{Thr})_{withGABA} - (g_{AMPA}^{Thr})_{w/oGABA}$ ].

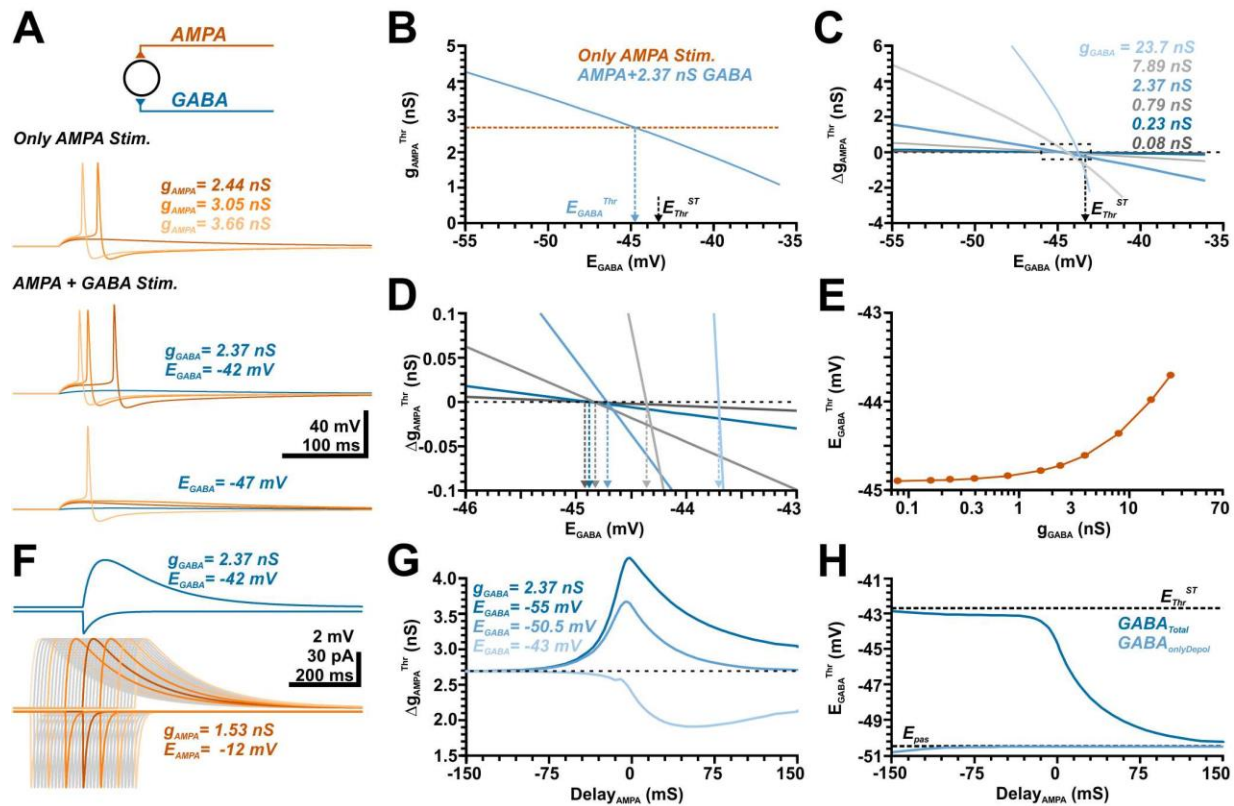

295

296 **Figure 4.** Influence of a GABAergic input at different  $E_{GABA}^{Thr}$  on the AMPA receptor-  
 297 dependent excitation threshold. A: Simulated voltage traces illustrating the membrane  
 298 responses induced by three different conductances of the AMPA synapse in the absence (top  
 299 traces) and the presence of a simultaneous GABAergic input at  $E_{GABA}$  of  $-42$  mV (middle traces)  
 300 and  $-47$  mV (lower traces). B: Plot of the minimal  $g_{AMPA}$  required to trigger an AP ( $g_{AMPA}^{Thr}$ )  
 301 versus the  $E_{GABA}$  of the synchronous GABA input ( $g_{GABA} = 2.37$  nS). The  $E_{GABA}$  value at which  
 302 this curve intersects with  $g_{AMPA}^{Thr}$  determined in the absence of GABA (orange line) defines the  
 303 GABA concentration at which GABA switches from excitatory to inhibitory ( $E_{GABA}^{Thr}$ ). C: Plot  
 304 of  $\Delta g_{AMPA}^{Thr}$  versus  $E_{GABA}$  for different  $g_{GABA}$  values, as indicated in the graph. D: A  
 305 magnification of the marked area in C allows the determination of  $E_{GABA}^{Thr}$  for the different  
 306  $g_{GABA}$ , color code as indicated in C. E: Plot of the  $E_{GABA}^{Thr}$  determined at different  $g_{GABA}$ . Note  
 307 that  $E_{GABA}^{Thr}$  is substantially negative to  $E_{Thr}^{ST}$  and increases at higher  $g_{GABA}$ . F: Simulation of



308 *membrane currents (downward deflections) and membrane changes (upward deflections) upon*  
309 *a GABAergic (blue traces) and glutamatergic stimulation. Gray and light orange traces*  
310 *represent temporally shifted glutamatergic inputs, performed to differentiate the effects of*  
311 *conductance vs. depolarization effects. Note that the depolarization shift outlasts the*  
312 *conductance shift for both inputs. G: Influence of the timing between AMPA and GABA input*  
313 *on  $\Delta g_{\text{AMPA}}^{\text{Thr}}$  determined at 3 exemplary  $E_{\text{GABA}}$ . Note that the maximal inhibitory effect at*  
314 *hyperpolarizing ( $E_{\text{GABA}} = -55 \text{ mV}$ ) or pure shunting GABAergic inputs ( $E_{\text{GABA}} = -50.5 \text{ mV}$ ) were*  
315 *observed for synchronous AMPA inputs, while the excitatory influence of GABA at depolarized*  
316  *$E_{\text{GABA}}$  of  $-43 \text{ mV}$  was maximal for substantially delayed AMPA inputs. H: Quantification of*  
317  *$E_{\text{GABA}}^{\text{Thr}}$  (dark blue) for different delays between GABA and AMPA inputs. Note that for AMPA*  
318 *inputs preceding GABA inputs  $E_{\text{GABA}}^{\text{Thr}}$  was close to the AP threshold, while for AMPA inputs*  
319 *lagging GABA inputs  $E_{\text{GABA}}^{\text{Thr}}$  approximated  $-50.5 \text{ mV}$ . The light blue traces represent  $E_{\text{GABA}}^{\text{Thr}}$*   
320 *determined for pure simulated GABAergic depolarizations which persistently results in a*  
321  *$E_{\text{GABA}}^{\text{Thr}}$  close to  $-50.5 \text{ mV}$ .*

322 In the first set of experiments we simulated the effect of GABA pulses provided synchronously  
323 with AMPA inputs in a ball model (Fig. 4A) using a constant  $g_{\text{GABA}}$  of 2.37 nS. These experiments  
324 demonstrated that the co-stimulation of a GABAergic input can attenuate or enhance AP triggering  
325 upon glutamatergic stimulation, depending on  $E_{\text{GABA}}$  (Fig. 4A). As expected, such a GABA co-  
326 stimulation enhanced  $g_{\text{AMPA}}^{\text{Thr}}$  at hyperpolarized  $E_{\text{GABA}}$ , while smaller  $g_{\text{AMPA}}^{\text{Thr}}$  values were  
327 required at more depolarized  $E_{\text{GABA}}$  (Fig. 4B). From the intersection of this  $g_{\text{AMPA}}^{\text{Thr}}$  with the  
328  $g_{\text{AMPA}}^{\text{Thr}}$  recorded in the absence of GABAergic inputs we determined that  $E_{\text{GABA}}^{\text{Thr}}$  amounted to  
329  $-44.7 \text{ mV}$  under this condition (Fig. 4B), which is considerable more negative than  $E_{\text{Thr}}^{\text{ST}}$  of  
330  $-43.04 \text{ mV}$  in the ball model. Additional experiments with different  $g_{\text{GABA}}$  values revealed that  
331  $E_{\text{GABA}}^{\text{Thr}}$  depends on  $g_{\text{GABA}}$  (Fig. 4C-E). However, only at rather large  $g_{\text{GABA}}$  values  $E_{\text{GABA}}^{\text{Thr}}$

332 approached toward values  $> -44$  mV. At lower, physiologically more relevant  $g_{GABA}$  values  
333  $E_{GABA}^{Thr}$  converges to a value of  $-44.9$  mV (Fig. 4E). This observation indicates that  $E_{GABA}^{Thr}$  was  
334 consistently lower than  $E_{Thr}^{ST}$ , implying that GABAergic inputs are under these conditions more  
335 excitatory than expected from the difference between  $E_{GABA}$  and  $E_{AP}^{Thr}$ .

336 It has already been proposed that the GABAergic depolarization outlasts the GABAergic currents  
337 and can add an additional excitatory drive to neurons [39]. Our simulations replicated this typical  
338 behavior, both GABAergic and glutamatergic membrane depolarization outlasted the time course  
339 of the respective currents (Fig. 4F). To investigate whether the systematic shift of  $E_{GABA}^{Thr}$  towards  
340 more hyperpolarized potentials was indeed caused by the differential impact of GABAergic  
341 conductance and GABAergic membrane depolarization on the AMPA-mediated excitation, we  
342 systematically advanced or delayed the time point of AMPA inputs (Fig. 4 F). These simulations  
343 revealed that, as expected, the strongest inhibitory effect of a GABAergic input for both  
344 hyperpolarizing (at  $E_{GABA} < RMP$ ) and shunting inhibition (at  $E_{GABA} = RMP$ ) was observed when  
345 it was synchronous to the glutamatergic input (Fig. 4G). In contrast, at more depolarized  $E_{GABA}$   
346 the maximal excitatory effect occurred when the AMPA input was given about 60 ms after the  
347 GABA input (Fig. 4G, light trace), i.e. at a time point when the GABAergic conductance virtually  
348 ceased, but a considerable GABAergic depolarization persisted (Fig. 4F, blue traces). A systematic  
349 determination of  $E_{GABA}^{Thr}$  for different delays demonstrated that  $E_{GABA}^{Thr}$  was relatively stable  
350 around  $-43$  mV for APMA inputs that preceded GABA inputs, and was thus close to  $E_{Thr}^{ST}$  (Fig.  
351 4H). In contrast, with increasing delays of the glutamatergic inputs  $E_{GABA}^{Thr}$  converged to  $-50.5$   
352 mV, i.e. to the RMP determined by the reversal potential of the passive membrane conductance  
353 (Fig. 4H). In summary, these findings suggest (i) that at preceding AMPA inputs the influence of  
354 GABA on this glutamatergic input was dominated by the GABAergic conductance change and

355 thus converged to  $E_{Thr}^{ST}$  and (ii) that at delayed glutamatergic inputs the influence of GABA on  
 356 this glutamatergic input was dominated by the GABAergic depolarization.

357 In the absence of a GABAergic conductance shift each depolarization above  $-50.5$  mV should  
 358 reduce the distance to the  $E_{AP}^{Thr}$  and should thus impose an excitatory effect. To verify this  
 359 hypothesis, we recorded the GABAergic currents at different  $E_{GABA}$  and replayed these currents to  
 360 the modelled neurons via I-clamp, thereby isolating the effect of the GABAergic depolarization  
 361 from the conductance shift. Indeed, these simulations demonstrated that the effect of the pure  
 362 GABAergic depolarization reversed at an  $E_{GABA}$  of  $-50.5$  mV (Fig. 4H, light trace).

363 In summary these experiments demonstrated that the effect of a GABAergic stimulus on  
 364 glutamatergic synaptic inputs cannot simply be predicted from the difference between  $E_{GABA}$  and  
 365 the  $E_{AP}^{Thr}$  threshold, but that, depending on the temporal relation between GABAergic and  
 366 glutamatergic inputs,  $E_{GABA}$  is substantially lower than  $E_{AP}^{Thr}$  and thus GABA acts more excitatory  
 367 than expected from the  $E_{GABA}$  to  $E_{AP}^{Thr}$  relation.

368 In the next set of experiments, we evaluated how the spatial relation between GABAergic and  
 369 glutamatergic inputs affects  $E_{GABA}^{Thr}$  in a ball-and-stick model. For these simulations, we  
 370 systematically varied both, GABA and AMPA synapse along the dendrite, using 20 equidistant  
 371 positions each (Fig. 5A), and stimulated both synapses.

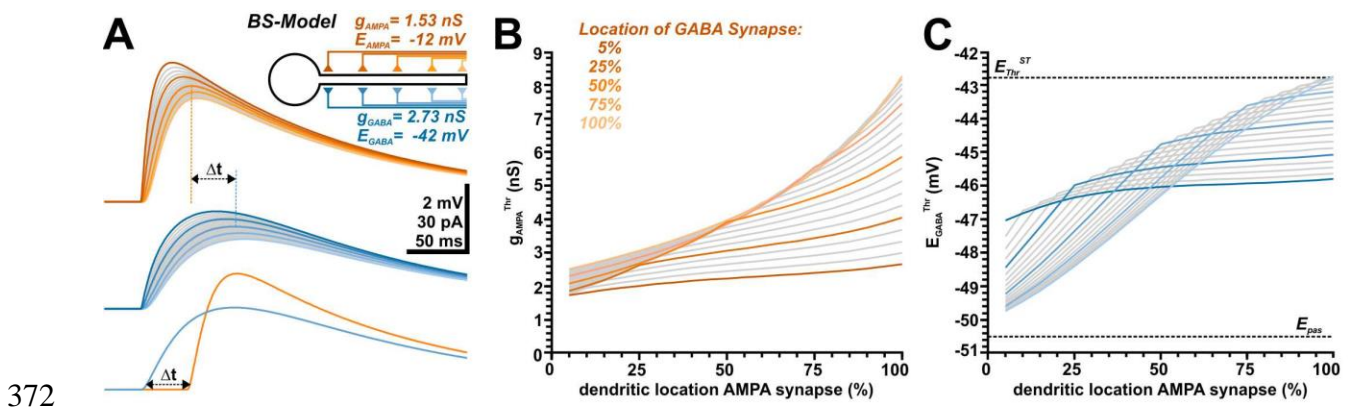

373 **Figure 5.** Influence of the spatial relation between the AMPA receptor-dependent and the  
374 GABA receptor-dependent synaptic input on  $g_{\text{AMPA}}^{\text{Thr}}$  and  $E_{\text{GABA}}^{\text{Thr}}$ . A: Simulated voltage traces  
375 illustrating the membrane responses induced by AMPA synapses (orange traces) and by GABA  
376 synapses (blue traces) located at different dendritic locations. The colored traces represent  
377 synapses at 5%, 25%, 50%, 75% and 100% of the dendritic length, as color-coded in the  
378 schematic inset. Note the slower onset kinetics and delayed peak for distant dendritic synapses.  
379 The lower traces depict how the delay of GABA and AMPA was adjusted to obtain synchronous  
380 peak depolarizations. B: Effect of the dendritic location on  $g_{\text{AMPA}}^{\text{Thr}}$  simulated for 20  
381 equidistant positions of the GABAergic synapse ( $g_{\text{GABA}} = 7.89 \text{ nS}$ ;  $E_{\text{GABA}} = -44 \text{ mV}$ ). Each line  
382 represents the results for one GABA synapse position, the color code identifies every 5<sup>th</sup> position  
383 as indicated. Note the shallow dependency of  $\Delta g_{\text{AMPA}}^{\text{Thr}}$  for proximal and the steep dependency  
384 for distal GABA synapses. C: Dependency of  $E_{\text{GABA}}^{\text{Thr}}$  on the dendritic positions of AMPA  
385 synapses, each line represents the results for one GABA synapse position, with shade coding  
386 as in B. Note the shallow location dependency with  $E_{\text{GABA}}^{\text{Thr}}$  around  $-46 \text{ mV}$  for the proximal  
387 GABA synapses, while for distal GABA synapses a steep  $E_{\text{GABA}}^{\text{Thr}}$  profile between ca.  $-43 \text{ mV}$   
388 and  $-50 \text{ mV}$  was observed.

389 Simulations of single inputs revealed that the time course of the glutamatergic and GABAergic  
390 depolarizations critically depended on the dendritic location (Fig. 5A), which reflect spatial  
391 filtering [58]. To prevent that this temporal scattering affects the spatial analysis of GABA/AMPA  
392 relations, we determined the maximum of the depolarization in control sweeps performed before  
393 each run of the definite simulation for each combination of  $g_{\text{AMPA}}$ , AMPA location,  $E_{\text{GABA}}$ , and  
394 GABA location in the absence of an AP mechanism. For the definite simulation sweep the  
395 temporal relation between glutamatergic and GABAergic input was shifted such that peak  
396 depolarization of GABA and AMPA responses coincided (Fig. 5A).

397 To get an impression how a depolarizing GABAergic input at different locations influences  
398  $g_{\text{AMPA}}^{\text{Thr}}$ , we first varied the position of a GABAergic synapse with a  $g_{\text{GABA}}$  of 7.89 nS and an  
399  $E_{\text{GABA}}$  of  $-44$  mV along the dendrite and determined  $g_{\text{AMPA}}^{\text{Thr}}$  for each of the 20 AMPA synapse  
400 along the dendrite (Fig. 5B). These simulations showed, as expected, that (i)  $g_{\text{AMPA}}^{\text{Thr}}$  increased  
401 with increasing dendritic distance, and (ii) that for a soma-near GABAergic synapse the excitatory  
402 effect of GABA was stronger than for distal dendritic locations, as indicated by the larger  $g_{\text{AMPA}}^{\text{Thr}}$   
403 required for the distal GABA synapses (Fig. 5B). However, we could also demonstrate that (iii)  
404 the slope of the  $g_{\text{AMPA}}^{\text{Thr}}$  became shallower for AMPA inputs distal to the GABA inputs (Fig. 5B),  
405 indicating a strong non-linear influence of GABAergic inputs. To determine how the spatial  
406 relation between glutamatergic and GABAergic inputs affects  $E_{\text{GABA}}^{\text{Thr}}$  we subsequently varied  
407  $E_{\text{GABA}}$  (at  $g_{\text{GABA}}$  of 7.89 nS) for all combinations of synaptic positions and determined when  
408  $\Delta g_{\text{AMPA}}^{\text{Thr}}$  switches the direction (Fig. 5C). These simulations revealed a complex relation between  
409 these three parameters. If the GABAergic synapse was located in the proximal dendrite close to  
410 the soma (Fig. 5, dark trace)  $E_{\text{GABA}}^{\text{Thr}}$  was only weakly dependent on the site of the AMPA synapse  
411 and amounted to values between ca.  $-45$  mV and  $-46$  mV. If the GABA synapse was located more  
412 distally (Fig. 5, lighter trace)  $E_{\text{GABA}}^{\text{Thr}}$  showed a step dependency on the location of the AMPA  
413 synapse for all AMPA synapses located proximally to the GABA synapse, while the shallow  
414 dependency was maintained for the more distal synapses (Fig. 5C). Under this condition  $E_{\text{GABA}}^{\text{Thr}}$   
415 approached  $-50$  mV for proximal AMPA synapses, i.e. when both synapses were  $950$   $\mu\text{m}$  apart  
416 and thus the GABAergic depolarization dominated over the more local shunting effect (see lightest  
417 blue trace in Fig. 5C). In contrast, for most distally located AMPA and GABA synapses, which  
418 represent spatially correlated inputs distant from the AP initiation zone,  $E_{\text{GABA}}^{\text{Thr}}$  approached  
419  $E_{\text{Thr}}^{\text{ST}}$  (Fig. 5C).

420 In summary, these results demonstrate that both, the spatial relation between GABAergic and  
 421 glutamatergic synapses as well as the location of the GABA synapse influences  $E_{GABA}^{Thr}$ .  
 422 However, only for spatially correlated inputs at distal dendrites  $E_{GABA}^{Thr}$  was close to the  $E_{AP}^{Thr}$ .  
 423 With increasing distance between both synapses and with a closer approximation of the GABA  
 424 synapse to the soma,  $E_{GABA}^{Thr}$  was shifted to more negative values, again indicating that GABA  
 425 mediates a more prominent excitatory action than expected from the difference between  $E_{GABA}$   
 426 and  $E_{AP}^{Thr}$ .

427

## 428 2.4. Effect of tonic GABAergic inputs on glutamatergic excitation

429 GABA influences neuronal excitability not only via synaptic inputs, but also extrasynaptic, tonic  
 430 GABAergic currents substantially contribute to the GABAergic effects [59,60] and can mediate  
 431 even excitation during development [45]. Therefore, we next analyzed how a tonic GABAergic  
 432 conductance ( $g_{GABA}^{tonic}$ ) influences  $g_{AMPA}^{Thr}$  and  $E_{GABA}^{Thr}$  in a ball model (Fig. 6A), using a  
 433  $g_{GABA}^{tonic}$  between 8.75 fS/cm<sup>2</sup> and 8.75 nS/cm<sup>2</sup>, corresponding to values from 1/100 to 10000  
 434 times of the experimentally determined tonic GABA conductance of 0.875 pS/cm<sup>2</sup> [52].

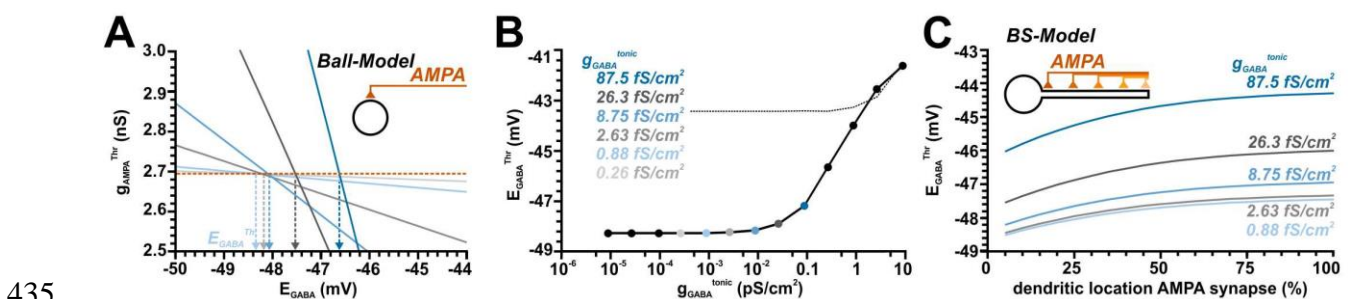

435

436 **Figure 6.** Influence of tonic GABAergic conductances on the AMPA receptor-dependent  
 437 excitability in a simple ball and a ball-and-stick model. A: Plot of  $g_{AMPA}^{Thr}$  at different  $E_{GABA}$ .  
 438 The differently shaded lines represent different tonic  $g_{GABA}$  values as indicated in B. The  
 439 increased slope of the curves with higher  $g_{GABA}^{tonic}$  illustrates the higher inhibitory effect under

440 *this conditions. From the intersection of the plots with the  $g_{GABA}^{Thr}$  value obtained in the absence*  
441 *of tonic GABA (orange line) the  $E_{GABA}^{Thr}$  values were determined. B: Plot of  $E_{GABA}^{Thr}$*   
442 *determined at different  $g_{GABA}^{tonic}$ . The dashed line represents  $E_{Thr}^{ST}$ . Note that  $E_{GABA}^{Thr}$  is*  
443 *negative to  $E_{Thr}^{ST}$  for  $g_{GABA}^{tonic} < ca\ 3\ pS/cm^2$ . C: Influence of different dendritic locations of*  
444 *AMPA synapses in a ball-and-stick model on the AMPA receptor-dependent excitability*  
445 *determined for different  $g_{GABA}^{tonic}$ . Note the substantial shift of  $E_{GABA}^{Thr}$  to positive values with*  
446 *more distant AMPA synapses and the systematic depolarized shift with increasing  $g_{GABA}^{tonic}$ .*

447 These experiments demonstrated, that  $g_{GABA}^{tonic}$  can attenuate or enhance AP induction by AMPA  
448 synapses, depending on  $E_{GABA}$ . As expected, the slope of the GABAergic influence increased with  
449  $g_{GABA}^{tonic}$  (Fig. 6A). And as expected, tonic GABAergic conductance enhanced  $g_{AMPA}^{Thr}$  at  
450 hyperpolarized  $E_{GABA}$ , while smaller  $g_{AMPA}^{Thr}$  values were required at more depolarized  $E_{GABA}$   
451 (Fig. 6A). From the intersection of these  $g_{AMPA}^{Thr}$  with the basal  $g_{AMPA}^{Thr}$  (obtained in the absence  
452 of tonic GABA),  $E_{GABA}^{Thr}$  was determined (Fig. 6B). Notably, these  $E_{GABA}^{Thr}$  were rather constant  
453 at ca.  $-48.3\ mV$  within a wide range of  $g_{GABA}^{tonic}$ , spanning from 0.001 to ca. 10 times the  
454 experimentally determined  $g_{GABA}^{tonic}$  value. Only at very high  $g_{GABA}^{tonic}$  of  $> 100\ fS/cm^2$   $E_{GABA}^{Thr}$   
455 approached  $E_{Thr}^{ST}$  (which under these conditions was shifted to positive values due to the  
456 massively enhanced total membrane conductance). In summary, these results indicate that tonic  
457 GABAergic conductances can mediate an excitatory effect even if  $E_{GABA}$  was substantially  
458 negative to  $E_{AP}^{Thr}$ .

459 Finally, we investigated how the  $E_{GABA}$  of  $g_{GABA}^{tonic}$  affects the excitation generated by AMPA  
460 synapses located along the dendrite in a ball-and-stick model (Fig. 6C). These simulations revealed  
461 (i) that  $E_{GABA}^{Thr}$  was systematically shifted to positive values (closer to  $E_{AP}^{Thr}$ ) for distal AMPA  
462 synapses and (ii) that  $E_{GABA}^{Thr}$  was also more positive (and thus closer to  $E_{AP}^{Thr}$ ) for larger  
463  $g_{GABA}^{tonic}$  at all dendritic positions (Fig. 6C). These observations suggest that a tonic GABAergic

464 conductance mediates an excitatory effect even at  $E_{GABA}$  that is substantially negative to  $E_{AP}^{Thr}$ ,  
465 but that an inhibitory effect of tonic GABAergic conductance is higher at distal AMPA-mediated  
466 inputs.



### 467 3. Discussion

468 Experimental findings indicate that  $[Cl^-]_i$  and  $[HCO_3^-]_i$  are dynamically shifted during early brain  
469 development, upon massive GABAergic activity and after pathophysiological insults [10,15,61].  
470 Thus it became evident that GABA can have depolarizing actions [8,13] and this raised the  
471 question under which conditions the activation of GABA<sub>A</sub> receptors can mediate an excitatory  
472 effect. Theoretical considerations suggested that GABA<sub>A</sub> receptor activation permits an inhibitory  
473 effect as long as  $E_{GABA}$  was below  $E_{Thr}^{AP}$  [35,36]. However, this consideration just reflects a quasi  
474 one-dimensional situation and ignores the temporal and spatial components of GABAergic  
475 membrane responses as well as the restriction imposed by the passive membrane properties within  
476 more complex neuronal topologies [37–39]. Because the exact role of GABA on the  
477 excitation/inhibition threshold is therefore hard to predict from such theoretical assumptions, we  
478 performed a detailed in-silico study using a simple neuronal topology and distinct spatiotemporal  
479 relations between GABAergic and glutamatergic inputs to evaluate at which  $E_{GABA}$  values the net  
480 GABA effect switches from inhibitory to excitatory. In these simulations we were able to  
481 demonstrate that (i) for GABAergic synapses located close to the AP initiation zone (AIP) the  
482 difference between  $E_{GABA}$  and  $E_{AP}^{Thr}$  indeed reliably predicts whether GABA has an excitatory or  
483 inhibitory action. (ii) The threshold GABA reversal potential ( $E_{GABA}^{Thr}$ ) was in this case close to  
484 the  $E_{AP}^{Thr}$  defined by the maximal subthreshold current injection ( $E_{Thr}^{ST}$ ). (iii)  $E_{GABA}^{Thr}$  was  
485 systematically shifted to positive values with increasing distance between the GABA synapse and  
486 the AIP. (iv) An excitatory effect of GABA inputs on synchronous AMPA mediated inputs was  
487 observed when  $E_{GABA}$  was above  $-44.9$  mV, and thus consistently hyperpolarized to  $E_{AP}^{Thr}$ . (v)  
488  $E_{GABA}^{Thr}$  critically depends on the temporal relation between GABA and AMPA inputs, with a  
489 striking excitatory effect on AMPA-mediated inputs appearing after the GABA input. (vi) The  
490 spatial relation between GABAergic and AMPA-mediated inputs critically influences  $E_{GABA}^{Thr}$ ,

491 with  $E_{GABA}^{Thr}$  systematically being shifted to values negative to  $E_{AP}^{Thr}$  for AMPA synapses located  
492 proximally to the GABA input. (vii) For tonic GABAergic conductances,  $E_{GABA}^{Thr}$  was  
493 systematically negative to  $E_{AP}^{Thr}$  over a wide range of  $g_{GABA}^{tonic}$  values spanning the physiological  
494 range. In summary, these results demonstrate that only for very restricted conditions the  
495 GABAergic effects switch from excitation to inhibition when  $E_{GABA}$  was at  $E_{AP}^{Thr}$ . Under several  
496 physiologically relevant conditions,  $E_{GABA}^{Thr}$  was negative to  $E_{AP}^{Thr}$ , suggesting that GABA can  
497 mediate excitatory effects already under these conditions.

498 It is important to note that in the present study we considered only  $E_{GABA}$  as the relevant parameter,  
499 which in reality depends not only on  $[Cl^-]_i$  but also on  $[HCO_3^-]_i$  [6]. We have chosen this approach  
500 to (i) ease the computational load, (ii) because the consideration of two independent variables  
501 makes the interpretation of the results more complicated, and (iii) because the relative  $HCO_3^-$   
502 conductance of  $GABA_A$  receptors differs between distinct neuronal subpopulations [6,62,63].  
503 Differences in intracellular fixed charges can also slightly influence the relation between  $[Cl^-]_i$ ,  
504  $E_{Cl}$  and the GABAergic driving force [64,65]. In addition, we did not consider that functionally  
505 relevant somato-dendritic  $[Cl^-]_i$  gradients exist in neurons [11,66] and that GABAergic synaptic  
506 activity, alone or correlated to glutamatergic inputs, considerably alters  $E_{GABA}$  [49,52,61,67–70].  
507 All of these properties will complicate the prediction of GABAergic response direction, however,  
508 for any interpretation of the functional consequences of temporal and spatially dynamic  $[Cl^-]_i$  (and  
509  $[HCO_3^-]_i$ ) gradients, it will be necessary to obtain a major framework to understand how the  
510 GABAergic response direction depends on the relation between  $E_{GABA}$ ,  $E_{AP}^{Thr}$  and spatiotemporal  
511 synaptic properties.

512 The first major result of this in-silico study was the observation that  $E_{GABA}^{Thr}$  determined for the  
513 GABAergic effect on AMPA-mediated inputs was in many cases considerably negative to  $E_{AP}^{Thr}$ ,  
514 in contrast to the initial theoretical consideration [35,36]. In our experiment we were also able to

515 provide a mechanistic explanation for this observation. First, by using a current-clamp approach  
516 we could replicate that the GABAergic depolarization, when isolated from the GABAergic  
517 conductance shift, acted excitatory whenever the peak GABAergic depolarization was positive to  
518 the RMP, resulting in an  $E_{GABA}^{Thr}$  of  $-50.5$  mV. This stringent excitatory effect can be easily  
519 explained by the fact that in the absence of conductance changes each depolarization brings  $E_m$   
520 closer to  $E_{AP}^{Thr}$ . Next, we could demonstrate, by providing AMPA-inputs with a defined advance  
521 or delay to the GABAergic inputs, a clear bimodal effect of depolarizing GABA responses. In all  
522 cases in which the AMPA inputs preceded the GABA input  $E_{GABA}^{Thr}$  was close to  $E_{AP}^{Thr}$  (Fig. 4H).  
523 Under this condition the AP initiation was under the control of the subsequent GABAergic  
524 conductance shift. And under this condition, the  $GABA_A$  receptor will mediate an inward current,  
525 corresponding to a putative excitatory effect, as long as  $E_{GABA}$  was positive to  $E_m$ , Thereby, an  
526 excitatory effect was induced only if  $E_{GABA}$  was above  $E_{AP}^{Thr}$ . However, if the AMPA-mediated  
527 inputs occurred after the GABAergic inputs,  $E_{GABA}^{Thr}$  was systematically shifted to more negative  
528 values approximating the RMP of  $-50.5$  mV. This effect can be attributed to the fact that the  
529 GABAergic depolarization outlasts the GABAergic conductance shift. Thus, under these  
530 conditions the depolarization progressively dominates the effect of GABA, leading to a gradual  
531 shift in  $E_{GABA}^{Thr}$  towards more negative potentials. If the GABAergic conductance can be  
532 neglected, each depolarizing shift, i.e. each membrane change depolarized to RMP, contributed to  
533 the excitation, leading again to an  $E_{GABA}^{Thr}$  of  $-50.5$  mV. The impact of the temporal profile of  
534 GABAergic conductance change vs. GABAergic depolarization on neuronal excitability has  
535 already been experimentally addressed in hypothalamic [39] and neocortical [40] neurons, where  
536 the initial phase of a GABA response prevented AP initiation, whereas at later time points of the  
537 GABAergic responses AP initiation was facilitated. Despite this clear latency-dependent effect,  
538 the reciprocal actions of a depolarization-induced facilitation and a conductance-induced shunting

539 inhibition can also explain why  $E_{GABA}^{Thr}$  for synaptic inputs was neither at RMP, which would be  
540 the case if only the membrane potential shift was relevant, nor at  $E_{Thr}^{AP}$ , which would be the case  
541 if  $E_m$  was only dependent on the actual GABAergic conductance.

542 In immature neurons, with their slow membrane time constants [71,72], the membrane responses  
543 are most probably prone to outlast the membrane conductance for both glutamatergic and  
544 GABAergic synaptic inputs. On the other hand, this effect of a prolonged membrane time constant  
545 in immature neurons may be partially compensated by the fact, that immature synaptic GABAergic  
546 currents show significantly longer decay time constants [72], thereby prolonging the interval in  
547 which the shunting inhibitory effects contributes to  $E_{GABA}^{Thr}$ . Another important functional  
548 consequence of our results is that the timing between GABAergic and glutamatergic inputs  
549 critically determines  $E_{GABA}^{Thr}$ . In this respect classical feedforward as well as recurrent inhibition,  
550 with its short latency to excitatory inputs [73], will impose a rather strict inhibition even at  
551 depolarizing GABAergic conditions as long as  $E_{GABA}$  is maintained below  $E_{Thr}^{AP}$ . Thus this kind  
552 of inhibitory control would be rather stable upon activity dependent shifts in  $E_{GABA}$   
553 [49,61,67,68,74]. On the other hand, for GABAergic inputs that are not temporally correlated with  
554 the excitatory inputs, e.g. during blanket inhibition, it must be considered that  $E_{GABA}^{Thr}$  can be  
555 negative to  $E_{AP}^{Thr}$ , and thus may mediate a less stable inhibition that is more sensitive to ionic  
556 plasticity.

557 The second major result of this in-silico study was the observation, that the spatial relation between  
558 GABAergic and AMPA inputs also critically affects  $E_{GABA}^{Thr}$ . As expected, our simulation  
559 revealed that the inhibitory effect, as quantified by  $\Delta g_{AMPA}^{Thr}$ , of proximal GABAergic synapses  
560 are stronger than that of distally located ones. The  $\Delta g_{AMPA}^{Thr}$  values were substantially larger for  
561 AMPA synapses located distally to the GABA synapse, indicating that a GABA input can shunt  
562 EPSPs from distally located excitatory synapses, as suggested from in-vitro and in-silico

563 experiments [40]. For proximally located GABA synapses we could observe that  $E_{GABA}$  showed  
564 only little dependency on the location of the AMPA-mediated inputs. In these cases,  $E_{GABA}^{Thr}$   
565 amounted to ca.  $-46$  mV, suggesting that both, shunting and depolarizing effects contribute to the  
566 impact of GABA on the excitability. In contrast, we observed for distally located GABA synapses  
567 a strong dependency of the location of AMPA-mediated inputs on  $E_{GABA}^{Thr}$ . For such distal GABA  
568 synapse locations a negative  $E_{GABA}^{Thr}$  close to  $-50$  mV was observed at proximal AMPA synapses,  
569 which reflects the fact that with this configuration only the electrotonically propagating  
570 GABAergic depolarization has an effective influence on the AMPA-mediated depolarization,  
571 while the GABAergic conductance shift acts more locally. For co-localized GABA and AMPA  
572 synapses at the distal end of the dendrite  $E_{GABA}^{Thr}$  approximated  $E_{AP}^{Thr}$  at ca.  $-43$  mV, indicating  
573 that here the effect of GABA was mediated mainly by membrane shunting. Intriguingly the “slope”  
574 of  $E_{GABA}^{Thr}$  was steeper for AMPA synapses in the dendritic segment proximal to the GABA  
575 synapse. The slope became shallower for the segment distal from the GABA synapse. This  
576 observation indicates that for all AMPA synapses distal to the GABA synapse a substantial fraction  
577 of the synaptic currents were shunted by the GABAergic conductance before they can affect AP  
578 initiation in the soma. In contrast, for all AMPA synapses located proximal to the GABA synapse  
579 the shunting effect was diminished with increasing distance between both synapses, whereas the  
580 electrotonically propagating depolarization maintained a more stable excitatory influence and  
581 thereby shifted  $E_{GABA}^{Thr}$  towards the RMP. Thus the results of our experiments suggest an  
582 additional mechanism that contribute the putative excitatory GABAergic effect of dendritic GABA  
583 inputs [40], in addition to the existence of stable or dynamic somato-dendritic  $[Cl^-]_i$  gradients  
584 [75,76].

585 These in-silico observations indicate that perisomatic inhibition, which is the dominant form for  
586 the classical feedback and feedforward inhibition mediated by parvalbumin-positive interneurons

587 [77,78], can maintain a stable inhibitory effect regardless of the site of glutamatergic inputs and  
588 ionic plasticity. On the other hand, the impact of GABAergic synapses located in the dendritic  
589 periphery, e.g. by the hippocampal O-LM interneurons [79] or neocortical Martinotti interneurons  
590 [80], will critically depend on the location of the excitatory glutamatergic inputs and can putatively  
591 mediate an excitatory impact on AMPA synapses close to the soma at slightly depolarizing  $E_{GABA}$ .  
592 In addition, our results indicate that for small to moderate tonic GABAergic conductance  $E_{GABA}^{Thr}$   
593 was systematically more negative than  $E_{AP}^{Thr}$ , which suggests that even at rather moderate  
594 depolarizations tonic GABAergic currents can mediate an excitatory effect. Only at higher  
595  $g_{GABA}^{tonic}$  the  $E_{GABA}^{Thr}$  approaches  $E_{AP}^{Thr}$ . The results of this simulation replicate the findings of a  
596 previous in-vitro study, that demonstrated excitatory effects of depolarizing tonic GABAergic  
597 responses at low conductances, whereas at higher conductances a stable inhibition was imposed  
598 [81]. Our results are also in line with the excitatory effects of extrasynaptic  $GABA_A$  receptors in  
599 the immature hippocampus [45]. In our simulations  $E_{GABA}^{Thr}$  remained stable at about  $-48.3$  mV  
600 for  $g_{GABA}^{tonic}$  smaller than ca.  $10^{-2}$  pS/cm<sup>2</sup>, which is close to the passive membrane conductance  
601  $g_{pas}$  of  $0.0128$  pS/cm<sup>2</sup>. We assume that below this value the shunting effects caused by  $g_{GABA}^{tonic}$   
602 were negligible to the background conductance  $g_{pas}$  and thus did not considerably contribute to the  
603 shunting of EPSCs. Only if  $g_{GABA}^{tonic}$  exceeded  $g_{pas}$  a relevant additional inhibitory component was  
604 imposed by the GABAergic conductances and thus  $E_{GABA}^{Thr}$  converged towards  $E_{AP}^{Thr}$ .  
605 Another conclusion that could be drawn from our study is that some attention should be taken to  
606 the method used to detect the AP threshold. Obviously there is, despite the frequent use of this  
607 descriptive parameter, no consensus on the definition of AP threshold [42]. Therefore, we used in  
608 this in-silico study four different, established methods for  $E_{AP}^{Thr}$  detection. Our in-silico  
609 experiments demonstrated that the AP threshold value determined from a fixed threshold of  $dV/dt$   
610 [44,50], from the first positive peak in  $d^3V/dt^3$  [51], and from linear regression of the AP upstroke

611 [43] were comparable at potentials of ca.  $-34$  mV to  $-37$  mV. In contrast, substantially negative  
612 values of  $-43$  mV were determined if  $E_{AP}^{Thr}$  was defined as the maximal potential that did not  
613 result in AP triggering ( $E_{Thr}^{ST}$ ). The difference in the results of these methods can be easily  
614 explained by the fact that  $E_{Thr}^{ST}$  represents a quasi-stationary value ( $dV/dt$  close to 0) that is just  
615 insufficient to trigger the entry to the Hodgkin cycle. On the other hand, the first three  $E_{AP}^{Thr}$  values  
616 represent distinct states during the dynamic events in the initial AP phase. The fact that in our  
617 simulations  $E_{GABA}^{Thr}$  for only GABAergic inputs indeed approximated  $E_{Thr}^{ST}$  can be related to the  
618 fact that the excitation threshold for GABAergic inputs was also determined under quasi-stationary  
619 conditions. For the influence of GABA on synaptic AMPA-mediated inputs the excitation  
620 threshold was determined in the interval between the onset of the GABA inputs and the duration  
621 at which 63% of the peak depolarization was obtained. Thus, for the relevant traces that  
622 distinguished between subthreshold and suprathreshold AMPA inputs,  $dV/dt$  was considerable  
623 small and thus the AP threshold was also determined under quasi stationary conditions. Under  
624 physiological conditions random fluctuation in  $E_m$  will most probably limit the difference between  
625  $E_{Thr}^{dV/dt}$ ,  $E_{Thr}^{d3}$ ,  $E_{Thr}^{IS}$ , and  $E_{Thr}^{ST}$ . In any way, while addition of membrane noise to the in-silico  
626 models and/or a different methodological definition of the excitation threshold for GABA- and  
627 AMPA-mediated inputs would probably change the absolute values for  $E_{GABA}^{Thr}$  and  $E_{AP}^{Thr}$ , it  
628 would not substantially interfere with the main observation of this study, that  $E_{GABA}^{Thr}$  is for many  
629 physiologically relevant situations negative to  $E_{AP}^{Thr}$ .

630 In conclusion, this simulation indicates that, in addition to the influence of short-term and long-  
631 term ionic plasticity, the uneven distribution of  $[Cl^-]_i$  gradients within individual cells and the  
632 effects of tonic and phasic inhibition [10,11,61,67], the observed spatial and temporal constraints  
633 on the  $E_{GABA}$  to  $E_{AP}^{Thr}$  relation imposes another level of complexity to the dynamic properties of  
634 GABAergic inhibition/excitation. While on one hand our results support the textbook knowledge

635 that GABA mediates a stable inhibition as long as hyperpolarizing membrane responses are evoked  
636 (or  $[Cl^-]_i$  is sufficiently low), on the other hand the altered  $[Cl^-]_i$  homeostasis in early development  
637 and several neurological conditions like trauma, stroke or epilepsy [11,12,30,31], can impact the  
638 level of inhibitory control already upon moderate  $[Cl^-]_i$  changes in a complex way.



## 639 **4. Materials and Methods**

### 640 **4.1. Electrophysiological procedures**

#### 641 **4.1.1. Slice preparation**

642 All experiments were conducted in accordance with EU directive 86/609/EEC for the use of  
643 animals in research and the NIH Guide for the Care and Use of Laboratory Animals, and were  
644 approved by the local ethical committee (Landesuntersuchungsanstalt RLP, Koblenz, Germany).  
645 We made all efforts to minimize the number of animals and their suffering. Newborn pups of  
646 postnatal days [P] 4-7 were obtained from time pregnant C57Bl/6 mice (Janvier Labs, Saint  
647 Berthevin, France) housed in the local animal facility at 12/12 day/night cycle and ad libitum  
648 access to food and water. The mouse pups were decapitated in deep enflurane (Ethrane, Abbot  
649 Laboratories, Wiesbaden, Germany) anaesthesia, their brains were quickly removed and immersed  
650 for 2-3 min in ice-cold standard artificial cerebrospinal fluid (ACSF, 125 mM NaCl, 25 mM  
651 NaHCO<sub>3</sub>, 1.25 mM NaH<sub>2</sub>PO<sub>4</sub>, 1 mM MgCl<sub>2</sub>, 2 mM CaCl<sub>2</sub>, 2.5 mM KCl, 10 mM glucose,  
652 equilibrated with 95% O<sub>2</sub> / 5 % CO<sub>2</sub>, osmolarity 306 mOsm). Four hundred µm thick horizontal  
653 slices including the hippocampus were cut on a vibratome (Microm HM 650 V, Thermo Fischer  
654 Scientific, Schwerte, Germany) and subsequently stored in an incubation chamber filled with  
655 oxygenated ACSF at room temperature for at least 1h before they were transferred to the recording  
656 chamber.

#### 657 **4.1.2 Patch-clamp recordings**

658 Whole-cell patch-clamp recordings were performed at  $31 \pm 1$  °C in a submerged-type recording  
659 chamber attached to the fixed stage of a microscope (BX51 WI, Olympus). Pyramidal neurons in the  
660 stratum pyramidale of the CA3 region were identified by their location and morphological appearance  
661 in infrared differential interference contrast image. Patch-pipettes (5-12 MΩ) were pulled from

662 borosilicate glass capillaries (2.0 mm outside, 1.16 mm inside diameter, Science Products, Hofheim,  
663 Germany) on a vertical puller (PP-830, Narishige) and filled with the pipette solutions (86 mM K-  
664 gluconate, 44 mM KCl, 4 mM NaCl, 1 mM CaCl<sub>2</sub>, 11 mM EGTA, 10 mM K-HEPES, 2 mM Mg<sup>2+</sup>-  
665 ATP, 0.5 mM Na-GTP, pH adjusted to 7.4 with KOH and osmolarity to 306 mOsm with sucrose). In  
666 few experiments 40 mM KCl were replaced with 40 mM K-gluconate. Signals were recorded with a  
667 discontinuous voltage-clamp/current-clamp amplifier (SEC05L, NPI, Tamm, Germany), low-pass  
668 filtered at 3 kHz and stored and analyzed using an ITC-1600 AD/DA board (HEKA) and TIDA  
669 software. All voltages were corrected post-hoc for liquid junction potentials of -8 mV for a [Cl<sup>-</sup>] of 10  
670 mM and -5 mV for 50 mM [20]. Input resistance and capacitance were determined from a series of  
671 hyperpolarizing current steps. Action potentials (AP) were induced by a series of depolarizing current  
672 steps. For averaging of AP wave forms the first AP from traces that showed a series of APs were used.

673

#### 674 **4.2. Compartmental modeling**

675 The compartmental modeling was performed using the NEURON environment (neuron.yale.edu).  
676 The source code of models and stimulation files used in the present paper can be found in  
677 ModelDB (<http://modeldb.yale.edu/267062>; reviewer password is “GABA”). For compartmental  
678 modelling we used either a simple ball (soma diameter = 43 μm) or a ball and stick model (soma  
679 with d=43 μm, linear dendrite with l=1000 μm, diameter 1 μm, and 301 nodes). In both models a  
680 passive conductance ( $g_{pas}$ ) with a density of  $1.28 \cdot 10^{-5}$  nS/cm<sup>2</sup> and a reversal potential ( $E_{pas}$ ) of  
681 -50.5 mV was distributed, which resulted for the ball-and-stick model in passive membrane  
682 properties that were comparable to the properties of recorded pyramidal CA3 neurons.  
683 Because it was not possible to generate a reasonable sharp AP onset with a standard Hodgkin-  
684 Huxley (HH) model and since we are particularly interested in the AP threshold properties, we

685 heuristically developed a modified Markov model, massively simplified from published Markov  
 686 models [82,83] to simulate the AP with a considerably precision. For this modified Markov model  
 687 we consider only 3 different states for the Na<sup>+</sup> channels [84]:

688  $Na_o = \text{open state}$

689  $Na_i = \text{inactive state, closed}$

690  $Na_c = \text{closed state, activatable}$

691 We restricted transitions between these states to  $Na_c \rightarrow Na_o$ ,  $Na_o \rightarrow Na_i$ ,  $Na_i \rightarrow Na_c$ ,  $Na_c \rightarrow Na_i$ .

692 The transition rate  $Na_c \rightarrow Na_o$  is only voltage dependent as described by a Boltzmann function:

693 
$$\frac{dV}{dt} = Q_{10} \times \frac{G_{c \rightarrow o}^{Na}}{\left(1 + e^{\frac{(V_t - V_{c \rightarrow o}^{Na})}{k_{c \rightarrow o}^{Na}}}\right)}$$

694 The transition  $Na_o \rightarrow Na_i$  is simulated by a voltage dependent kinetic rate described by a Boltzmann  
 695 equation with is operational after a defined delay period plus a constant voltage-independent term

696 
$$\frac{dV}{dt} = Q_{10} \times \frac{G_{o \rightarrow i}^{Na}}{\left(1 + e^{\frac{(V_{t\Delta} - V_{o \rightarrow i}^{Na})}{k_{o \rightarrow i}^{Na}}}\right)} + c_{o \rightarrow i}^{dec}$$

697 The transition rates  $Na_c \rightarrow Na_i$  and  $Na_i \rightarrow Na_c$  are described again by simple Boltzmann functions as  
 698 follows:

699 
$$\frac{dV}{dt} = Q_{10} \times \frac{G_{c \rightarrow i}^{Na}}{\left(1 + e^{\frac{(V_t - V_{c \rightarrow i}^{Na})}{k_{c \rightarrow i}^{Na}}}\right)} \text{ and } \frac{dV}{dt} = Q_{10} \times \frac{G_{i \rightarrow c}^{Na}}{\left(1 + e^{\frac{(V_t - V_{i \rightarrow c}^{Na})}{k_{i \rightarrow c}^{Na}}}\right)}$$

700 In addition, we implemented a simple two state modified Markov model for the delayed rectifier  
 701  $K^+$  current, with the  $K_c \rightarrow K_o$  transition rate described by a Boltzmann equation with an operational  
 702 delay period as follows:

$$703 \quad \frac{dV}{dt} = Q_{10} \times \frac{G_{c \rightarrow o}^K}{\left(1 + e^{\frac{(V_{t\Delta} - V_{c \rightarrow o}^K)}{k_{c \rightarrow o}^K}}\right)}$$

704 And the  $K_o \rightarrow K_c$  transition rate described by a Boltzmann equation with an operational delay period:

$$705 \quad \frac{dV}{dt} = Q_{10} \times \frac{G_{o \rightarrow c}^K}{\left(1 + e^{\frac{(V_{t\Delta} - V_{o \rightarrow c}^K)}{k_{o \rightarrow c}^K}}\right)}$$

706 All states for the  $Na^+$  and  $K^+$  channels are normalized at each iteration step as follows:

$$707 \quad Na_o + Na_i + Na_c = 1 \text{ and } K_o + K_c = 1$$

708 The  $Na^+$  current was given according to Ohms law as:

$$709 \quad I_{Na}(t) = g_{Na} * Na_o(t) * (v(t) - E_{Na})$$

710 And the  $K^+$  current was as:

$$711 \quad I_K(t) = g_K * K_o(t) * (v(t) - E_K)$$

712 All parameters were optimized by stepwise approximation to obtain a sufficient fit to the average  
 713 experimentally determined AP trace, which was quantified by minimizing the root of the  
 714 summarized squared errors according to the following error weight function:

$$715 \quad Error = 10 \times \sqrt{(E_{Thr}^{d3})^2} + 3 \times \sqrt{(v_{rise}^{max})^2} + \sqrt{(v_{decay}^{max})^2} + \sqrt{(d_{1/2})^2} + \sqrt{(E_{AP}^{Peak})^2}$$

716 This error function was used with the rationale to put special emphasise for the fitting routine to  
 717 the dynamic properties at  $E_{AP}^{Thr}$ . The used parameters are given in Table 2.

718 AMPA synapses were modeled by an Exp2Syn point process using a reversal potential of -12 mV,  
719 a tau1 value of 0.1 ms and a tau2 value of 11 ms, in accordance with the experimentally determined  
720 value [49]. GABA synapses were modeled by an Exp2Syn point process using a tau1 value of 0.1  
721 ms and a tau2 value of 37 ms, in accordance with the experimentally determined value [49]. The  
722 reversal potential of the GABAergic synapses was the main variable of interest in these  
723 simulations. For tonic GABAergic currents a constant membrane conductance was distributed over  
724 all membrane with conductance densities and reversal potentials as given in the results part.

725 For the determination of  $g_{GABA}^{Thr}$  we used an iterative approach where  $g_{GABA}$  was first increased  
726 by 1 nS steps until an AP was induced within an interval of 800 ms after the GABA input.  
727 Subsequently  $g_{GABA}$  was decreased by 0.33 nS steps until the AP vanished, followed again by an  
728 increase in  $g_{GABA}$  by 0.1 pS until the AP reappeared. This alternating sequence was repeated 6  
729 times using a  $g_{GABA}$  of 1/10 for each subsequent round. In these experiments  $E_{AP}^{Thr}$  was defined  
730 as the peak voltage of the last subthreshold sweep.

731 A similar approach was also used to determine  $g_{AMPA}^{Thr}$ . Here  $g_{AMPA}$  was initially increased by  
732 0.01 nS steps until an AP was induced. The analysis interval was in all sweeps set to the interval  
733 between stimulus onset and the time point when the AMPA-mediated depolarization, determined  
734 in the absence of an AP mechanism, decreased to 63% of the peak amplitude. Subsequent  $g_{AMPA}$   
735 was decreased by 3.3 pS until the AP disappears, followed by 6 rounds of alternating  
736 increasing/decreasing  $g_{AMPA}$  steps, with  $g_{AMPA}$  step values decreasing by 1/10 for each round.

737

738 **Author Contributions:** Conceptualization: WK; Electrophysiological investigation: AL, Formal  
739 analysis, AL and WK; Modeling: WK: Writing WK, AL, and HJL.

740

741 **Financial disclosure statement:** This research was funded by grants of the Deutsche  
742 Forschungsgemeinschaft to WK (KI-835/3) and to HJL (CRC 1080, A01).

743

744 **Conflicts of Interest:** The authors declare no conflict of interest

745

746

747 **References:**

- 748 1. Mody I, Pearce RA. Diversity of inhibitory neurotransmission through GABA(A) receptors.  
749 Trends Neurosci. 2004;27: 569–575.
- 750 2. Whittington MA, Traub RD. Interneuron Diversity series: Inhibitory interneurons and  
751 network oscillations in vitro. Trends Neurosci. 2003; 26:676–682.  
752 doi:10.1016/j.tins.2003.09.016
- 753 3. Gabernet L, Jadhav SP, Feldman DE, Carandini M, Scanziani M. Somatosensory integration  
754 controlled by dynamic thalamocortical feed-forward inhibition. Neuron. 2005; 48:315-327.  
755 doi:10.1016/j.neuron.2005.09.022
- 756 4. Swanson OK, Maffei A. From hiring to firing: Activation of inhibitory neurons and their  
757 recruitment in behavior. Front Mol Neurosci. 2019;12: 1–9. doi:10.3389/fnmol.2019.00168
- 758 5. Ulrich D, Bettler B. GABAB receptors: synaptic functions and mechanisms of diversity.  
759 Curr Opin Neurobiol 2007; 17:298-303. doi:10.1016/j.conb.2007.04.001
- 760 6. Farrant M, Kaila K. The cellular, molecular and ionic basis of GABA(A) receptor signalling.  
761 ProgBrain Res. 2007;160: 59–87.
- 762 7. Mueller AL, Chesnut RM, Schwartzkroin PA. Actions of GABA in developing rabbit  
763 hippocampus: an in vitro study. Neurosci Lett. 1983; 39:193-198. doi:10.1016/0304-  
764 3940(83)90076-9
- 765 8. Ben-Ari Y, Cherubini E, Corradetti R, Gaiarsa J-L. Giant synaptic potentials in immature rat  
766 CA3 hippocampal neurones. J Physiol. 1989;416: 303–325.
- 767 9. Luhmann HJ, Prince DA. Postnatal maturation of the GABAergic system in rat neocortex. J  
768 Neurophysiol. 1991; 65:247-263. doi:10.1152/jn.1991.65.2.247
- 769 10. Blaesse P, Airaksinen MS, Rivera C, Kaila K. Cation-chloride cotransporters and neuronal  
770 function. Neuron. 2009;61: 820–838.
- 771 11. Kaila K, Price TJ, Payne JA, Puskarjov M, Voipio J. Cation-chloride cotransporters in  
772 neuronal development, plasticity and disease. Nat Rev Neurosci. 2014;15: 637–654.  
773 doi:10.1038/nrn3819
- 774 12. Watanabe M, Fukuda A. Development and regulation of chloride homeostasis in the central  
775 nervous system. Front Cell Neurosci. 2015; 9:371. doi:10.3389/fncel.2015.00371
- 776 13. Ben Ari Y, Woodin MA, Sernagor E, Cancedda L, Vinay L, Rivera C, et al. Refuting the  
777 challenges of the developmental shift of polarity of GABA actions: GABA more exciting  
778 than ever! Front Cell Neurosci. 2012;6:35.
- 779 14. Huebner CA, Holthoff K. Anion transport and GABA signaling. Front Cell Neurosci.  
780 2013;7:177.
- 781 15. Kirmse K, Hübner CA, Isbrandt D, Witte OW, Holthoff K. GABAergic Transmission during  
782 Brain Development: Multiple Effects at Multiple Stages. Neuroscientist. 2018; 24:36-51.  
783 doi:10.1177/1073858417701382
- 784 16. Rivera C, Voipio J, Payne JA, Ruusuvuori E, Lahtinen H, Lamsa K, et al. The K<sup>+</sup>/Cl<sup>-</sup> co-  
785 transporter KCC2 renders GABA hyperpolarizing during neuronal maturation. Nature.  
786 1999;397: 251–255.

- 787 17. Rohrbough J, Spitzer NC. Regulation of intracellular Cl<sup>-</sup> levels by Na<sup>(+)</sup>-dependent Cl<sup>-</sup>  
788 cotransport distinguishes depolarizing from hyperpolarizing GABA<sub>A</sub> receptor-mediated  
789 responses in spinal neurons. *J Neurosci*. 1996;16: 82–91.
- 790 18. Plotkin MD, Snyder EY, Hebert SC, Delpire E. Expression of the Na-K-2Cl cotransporter is  
791 developmentally regulated in postnatal rat brains: A possible mechanism underlying  
792 GABA's excitatory role in immature brain. *J Neurobiol*. 1997;33: 781–795.
- 793 19. Yamada J, Okabe A, Toyoda H, Kilb W, Luhmann HJ, Fukuda A. Cl<sup>-</sup> uptake promoting  
794 depolarizing GABA actions in immature rat neocortical neurones is mediated by NKCC1. *J*  
795 *Physiol*. 2004; 557:829-841. doi:10.1113/jphysiol.2004.062471
- 796 20. Achilles K, Okabe A, Ikeda M, Shimizu-Okabe C, Yamada J, Fukuda A, et al. Kinetic  
797 properties of Cl<sup>-</sup> uptake mediated by Na<sup>+</sup>-dependent K<sup>+</sup>-2Cl<sup>-</sup> cotransport in immature rat  
798 neocortical neurons. *J Neurosci*. 2007;27: 8616-8627. doi:10.1523/JNEUROSCI.5041-  
799 06.2007
- 800 21. Virtanen MA, Uvarov P, Hübner CA, Kaila K. NKCC1, an Elusive Molecular Target in  
801 Brain Development: Making Sense of the Existing Data. *Cells*. 2020;9: 1–20.  
802 doi:10.3390/cells9122607
- 803 22. Le Magueresse C, Monyer H. GABAergic Interneurons Shape the Functional Maturation of  
804 the Cortex. *Neuron*. 2013;77: 388–405. doi:10.1016/j.neuron.2013.01.011
- 805 23. Luhmann HJ, Kirischuk S, Sinning A, Kilb W. Early GABAergic circuitry in the cerebral  
806 cortex. *Curr Opin Neurobiol*. 2014;26:72-78. doi:10.1016/j.conb.2013.12.014
- 807 24. LoTurco JJ, Owens DF, Heath MJS, Davis MBE, Kriegstein AR. GABA and glutamate  
808 depolarize cortical progenitor cells and inhibit DNA synthesis. *Neuron*. 1995; 15:1287-1298.  
809 doi:10.1016/0896-6273(95)90008-X
- 810 25. Blanquie O, Liebmann L, Hübner CA, Luhmann HJ, Sinning A. NKCC1-Mediated  
811 GABAergic Signaling Promotes Postnatal Cell Death in Neocortical Cajal-Retzius Cells.  
812 *Cereb Cortex*. 2017;27: 1644–1659. doi:10.1093/cercor/bhw004
- 813 26. Inada H, Watanabe M, Uchida T, Ishibashi H, Wake H, Nemoto T, et al. GABA regulates  
814 the multidirectional tangential migration of GABAergic interneurons in living neonatal  
815 mice. *PLoS One*. 2011; 6:e27048. doi:10.1371/journal.pone.0027048
- 816 27. Sernagor E, Chabrol F, Bony G, Cancedda L. Gabaergic control of neurite outgrowth and  
817 remodeling during development and adult neurogenesis: General rules and differences in  
818 diverse systems. *Front Cell Neurosci*. 2010;4: 11. doi:10.3389/fncel.2010.00011
- 819 28. Deidda G, Allegra M, Cerri C, Naskar S, Bony G, Zunino G, et al. Early depolarizing  
820 GABA controls critical-period plasticity in the rat visual cortex. *Nat Neurosci*. 2014; 18:87-  
821 96. doi:10.1038/nn.3890
- 822 29. Wang DD, Kriegstein AR. Blocking early GABA depolarization with bumetanide results in  
823 permanent alterations in cortical circuits and sensorimotor gating deficits. *Cereb Cortex*.  
824 2011; 21:574-587. doi:10.1093/cercor/bhq124
- 825 30. Dzhala V, Valeeva G, Glykys J, Khazipov R, Staley K. Traumatic alterations in GABA  
826 signaling disrupt hippocampal network activity in the developing brain. *J Neurosci*. 2012;32:  
827 4017–4031. doi:10.1523/JNEUROSCI.5139-11.2012



- 828 31. Jaenisch N, Witte OW, Frahm C. Downregulation of potassium chloride cotransporter  
829 KCC2 after transient focal cerebral ischemia. *Stroke*. 2010;41: 151–159.  
830 doi:10.1161/STROKEAHA.109.570424
- 831 32. Edwards DH. Mechanisms of depolarizing inhibition at the crayfish giant motor synapse. I.  
832 Electrophysiology. *J Neurophysiol*. 1990;64:532-540. doi:10.1152/jn.1990.64.2.532
- 833 33. Staley KJ, Mody I. Shunting of excitatory input to dentate gyrus granule cells by a  
834 depolarizing GABA(A) receptor-mediated postsynaptic conductance. *J Neurophysiol*.  
835 1992;68:197-212. doi:10.1152/jn.1992.68.1.197
- 836 34. Egawa K, Fukuda A. Pathophysiological power of improper tonic GABA A conductances in  
837 mature and immature models. *Front Neural Circuits*. 2013;7: 1–15.  
838 doi:10.3389/fncir.2013.00170
- 839 35. Ben-Ari Y, Gaiarsa JL, Tyzio R, Khazipov R. GABA: A pioneer transmitter that excites  
840 immature neurons and generates primitive oscillations. *Physiol Rev*. 2007;87: 1215–1284.  
841 doi:10.1152/physrev.00017.2006
- 842 36. Owens DF, Kriegstein AR. Is there more to GABA than synaptic inhibition? *Nat Rev*  
843 *Neurosci*. 2002;3: 715–727. doi:10.1038/nrn919
- 844 37. Jadi M, Polsky A, Schiller J, Mel BW. Location-dependent effects of inhibition on local  
845 spiking in pyramidal neuron dendrites. *PLoS Comput Biol*. 2012;8: e1002550.  
846 doi:10.1371/journal.pcbi.1002550
- 847 38. Spruston N, Stuart G, Häusser M. Principles of dendritic integration. in *Dendrites* (Spruston  
848 N, Stuart G, Häusser M eds.) 3<sup>rd</sup> edition, Oxford University Press, 2016.  
849 doi:10.1093/acprof:oso/9780198745273.003.0012
- 850 39. Gao XB, Chen G, Van Den Pol AN. GABA-dependent firing of glutamate-evoked action  
851 potentials at AMPA/kainate receptors in developing hypothalamic neurons. *J Neurophysiol*.  
852 1998;79: 716–726. doi:10.1152/jn.1998.79.2.716
- 853 40. Gullledge AT, Stuart GJ. Excitatory actions of GABA in the cortex. *Neuron*. 2003;37: 299–  
854 309.
- 855 41. Howard MA, Rubel EW. Dynamic spike thresholds during synaptic integration preserve and  
856 enhance temporal response properties in the avian cochlear nucleus. *J Neurosci*. 2010;30-  
857 12063-12074. doi:10.1523/JNEUROSCI.1840-10.2010
- 858 42. Platkiewicz J, Brette R. A threshold equation for action potential initiation. *PLoS Comput*  
859 *Biol*. 2010;6: 25. doi:10.1371/journal.pcbi.1000850
- 860 43. Kolbaev SN, Achilles K, Luhmann HJ, Kilb W. Effect of depolarizing GABA A-mediated  
861 membrane responses on excitability of cajal-retzius cells in the immature rat neocortex. *J*  
862 *Neurophysiol*. 2011;106: 2034–2044. doi:10.1152/jn.00699.2010
- 863 44. Valeeva G, Abdullin A, Tyzio R, Skorinkin A, Nikolski E, Ben-Ari Y, et al. Temporal  
864 coding at the immature depolarizing gabaergic synapse. *Front Cell Neurosci*. 2010;4: 1–12.  
865 doi:10.3389/fncel.2010.00017
- 866 45. Kolbaev SN, Sharopov S, Dierkes PW, Luhmann HJ, Kilb W. Phasic GABA A-receptor  
867 activation is required to suppress epileptiform activity in the CA3 region of the immature rat  
868 hippocampus. *Epilepsia*. 2012;53: 888–896.

- 869 46. Murata Y, Colonnese MT. GABAergic interneurons excite neonatal hippocampus in vivo.  
870 *Sci Adv.* 2020;6: eaba1430. doi:10.1126/sciadv.aba1430
- 871 47. Flossmann T, Kaas T, Rahmati V, Kiebel SJ, Witte OW, Holthoff K, et al. Somatostatin  
872 Interneurons Promote Neuronal Synchrony in the Neonatal Hippocampus. *Cell Rep.*  
873 2019;26: 3173-3182. doi: 10.1016/j.celrep.2019.02.061.
- 874 48. Kirmse K, Kummer M, Kovalchuk Y, Witte OW, Garaschuk O, Holthoff K. GABA  
875 depolarizes immature neurons and inhibits network activity in the neonatal neocortex in  
876 vivo. *Nat Commun.* 2015;6: 7750.
- 877 49. Lombardi A, Jedlicka P, Luhmann HJ, Kilb W. Giant depolarizing potentials trigger  
878 transient changes in the intracellular Cl<sup>-</sup> concentration in CA3 pyramidal neurons of the  
879 immature mouse hippocampus. *Front Cell Neurosci.* 2018;12:420.  
880 doi:10.3389/fncel.2018.00420
- 881 50. Kole MHP, Stuart GJ. Is action potential threshold lowest in the axon? *Nat Neurosci.*  
882 2008;11: 1253–1255. doi:10.1038/nn.2203
- 883 51. Henze DA, Buzsáki G. Action potential threshold of hippocampal pyramidal cells in vivo is  
884 increased by recent spiking activity. *Neuroscience.* 2001;105: 121–130. doi:10.1016/S0306-  
885 4522(01)00167-1
- 886 52. Kolbaev SN, Mohapatra N, Chen R, Lombardi A, Staiger JF, Luhmann HJ, et al. NKCC-1  
887 mediated Cl<sup>-</sup> uptake in immature CA3 pyramidal neurons is sufficient to compensate phasic  
888 GABAergic inputs. *Sci Rep.* 2020;10: 18399. doi:10.1038/s41598-020-75382-1
- 889 53. Ehrlich DE, Ryan SJ, Hazra R, Guo JD, Rainnie DG. Postnatal maturation of GABAergic  
890 transmission in the rat basolateral amygdala. *J Neurophysiol.* 2013;110: 926–941.  
891 doi:10.1152/jn.01105.2012
- 892 54. Leinekugel X, Khazipov R, Cannon R, Hirase H, Ben-Ari Y, Buzsáki G. Correlated Bursts  
893 of Activity in the Neonatal Hippocampus in Vivo. *Science* 2002;296: 2049–2052.  
894 doi:10.1126/science.1071111
- 895 55. Haider B, Duque A, Hasenstaub AR, McCormick DA. Neocortical network activity in vivo  
896 is generated through a dynamic balance of excitation and inhibition. *J Neurosci.* 2006;26:  
897 4535–4545. doi:10.1523/JNEUROSCI.5297-05.2006
- 898 56. Pernía-Andrade AJ, Jonas P. Theta-Gamma-Modulated Synaptic Currents in Hippocampal  
899 Granule Cells InVivo Define a Mechanism for Network Oscillations. *Neuron.* 2014;81: 140–  
900 152. doi:10.1016/j.neuron.2013.09.046
- 901 57. Sipilä ST, Kaila K. GABAergic control of CA3-driven network events in the developing  
902 hippocampus. *Results Probl Cell Differ.* 2007;44: 99–121. doi:10.1007/400\_2007\_033
- 903 58. Rall W. Cable theory for dendritic neurons. In Koch C, Segev I (eds) *Methods in Neuronal*  
904 *Modeling.* MIT press 1989.
- 905 59. Stell BM, Mody I. Receptors with different affinities mediate phasic and tonic GABA(A)  
906 conductances in hippocampal neurons. *J Neurosci.* 2002;22:RC223. doi:20026399
- 907 60. Brickley SG, Mody I. Extrasynaptic GABA A Receptors: Their Function in the CNS and  
908 Implications for Disease. *Neuron.* 2012;73: 23–34. doi:10.1016/j.neuron.2011.12.012

- 909 61. Wright R, Raimondo J V, Akerman CJ. Spatial and Temporal Dynamics in the Ionic Driving  
910 Force for GABA(A) Receptors. *Neural Plast.* 2011; 2011:728395. doi: 10.1155/2011/728395
- 911 62. Bormann J, Hamill OP, Sakmann B. Mechanism of anion permeation through channels  
912 gated by glycine and gamma-aminobutyric acid in mouse cultured spinal neurones. *J*  
913 *Physiol.* 1987;385: 243–286. doi:10.1113/jphysiol.1987.sp016493
- 914 63. Fatima-Shad K, Barry PH. Anion permeation in GABA- and glycine-gated channels of  
915 mammalian cultured hippocampal neurons. *Proc R Soc B Biol Sci.* 1993;253: 69–75.  
916 doi:10.1098/rspb.1993.0083
- 917 64. Glykys J, Dzhalala V, Egawa K, Balena T, Saponjian Y, Kuchibhotla K V, et al. Local  
918 Impermeant Anions Establish the Neuronal Chloride Concentration. *Science.* 2014;343:  
919 670–675. Available: <http://www.sciencemag.org/content/343/6171/670.abstract>
- 920 65. Düsterwald KM, Currin CB, Burman RJ, Akerman CJ, Kay AR, Raimondo J V. Biophysical  
921 models reveal the relative importance of transporter proteins and impermeant anions in  
922 chloride homeostasis. *Elife.* 2018;7: 39575. doi:10.7554/eLife.39575
- 923 66. Jarolimek W, Lewen A, Misgeld U. A furosemide-sensitive K<sup>+</sup>-Cl<sup>-</sup> cotransporter  
924 counteracts intracellular Cl<sup>-</sup> accumulation and depletion in cultured rat midbrain neurons. *J*  
925 *Neurosci.* 1999;19: 4695–4704.
- 926 67. Raimondo JV, Markram H, Akerman CJ. Short-term ionic plasticity at GABAergic  
927 synapses. *Front Synaptic Neurosci.* 2012;4: 5. doi:10.3389/fnsyn.2012.00005
- 928 68. Currin CB, Trevelyan AJ, Akerman CJ, Raimondo J V. Chloride dynamics alter the input-  
929 output properties of neurons. *PLoS Comput Biol.* 2020;16: e1007932.  
930 doi:10.1371/journal.pcbi.1007932
- 931 69. Lombardi A, Jedlicka P, Luhmann HJ, Kilb W. Coincident glutamatergic depolarizations  
932 enhance GABAA receptor-dependent Cl<sup>-</sup> influx in mature and suppress Cl<sup>-</sup> efflux in  
933 immature neurons. *PLOS Comput Biol.* 2021;17: e1008573.  
934 doi:10.1371/journal.pcbi.1008573
- 935 70. Halbhuber L, Aichtner C, Luhmann HJ, Sinning A, Kilb W. Coincident Activation of  
936 Glutamate Receptors Enhances GABAA Receptor-Induced Ionic Plasticity of the  
937 Intracellular Cl<sup>-</sup>-Concentration in Dissociated Neuronal Cultures. *Front Cell Neurosci.*  
938 2019;13: 497. doi:10.3389/fncel.2019.00497
- 939 71. Luhmann HJ, Reiprich RA, Hanganu I, Kilb W. Cellular physiology of the neonatal rat  
940 cerebral cortex: Intrinsic membrane properties, sodium and calcium currents. *J Neurosci*  
941 *Res.* 2000;62: 574-584. doi:10.1002/1097-4547(20001115)62:4<574::AID-  
942 JNR12>3.0.CO;2-0
- 943 72. Doischer D, Hosp JA, Yanagawa Y, Obata K, Jonas P, Vida I, et al. Postnatal differentiation  
944 of basket cells from slow to fast signaling devices. *J Neurosci.* 2008;28: 12956–12968.  
945 doi:10.1523/JNEUROSCI.2890-08.2008
- 946 73. Isaacson JS, Scanziani M. How inhibition shapes cortical activity. *Neuron.* 2011;72: 231–  
947 243. doi:10.1016/j.neuron.2011.09.027
- 948 74. Jedlicka P, Deller T, Gutkin BS, Backus KH. Activity-dependent intracellular chloride  
949 accumulation and diffusion controls GABAA receptor-mediated synaptic transmission.  
950 *Hippocampus.* 2011;21: 885–898. doi:10.1002/hipo.20804

- 951 75. Kuner T, Augustine GJ. A genetically encoded ratiometric indicator for chloride: Capturing  
952 chloride transients in cultured hippocampal neurons. *Neuron*. 2000;27: 447–459.  
953 doi:10.1016/S0896-6273(00)00056-8
- 954 76. Staley KJ, Soldo BL, Proctor WR. Ionic mechanisms of neuronal excitation by inhibitory  
955 GABAA receptors. *Science*. 1995;269: 977–981. doi:10.1126/science.7638623
- 956 77. Freund TF. Interneuron Diversity series: Rhythm and mood in perisomatic inhibition.  
957 *Trends Neurosci*. 2003;26: 489–495. doi:10.1016/S0166-2236(03)00227-3
- 958 78. Elgueta C, Bartos M. Dendritic inhibition differentially regulates excitability of dentate  
959 gyrus parvalbumin-expressing interneurons and granule cells. *Nat Commun*. 2019;10: 5561.  
960 doi:10.1038/s41467-019-13533-3
- 961 79. Somogyi P, Klausberger T. Defined types of cortical interneurone structure space and spike  
962 timing in the hippocampus. *J Physiol*. 2005;562: 9–26. doi:10.1113/jphysiol.2004.078915
- 963 80. Ascoli GA, Alonso-Nanclares L, Anderson SA, Barrionuevo G, Benavides-Piccione R,  
964 Burkhalter A, et al. Petilla terminology: Nomenclature of features of GABAergic  
965 interneurons of the cerebral cortex. *Nat Rev Neurosci*. 2008;9: 557–568.  
966 doi:10.1038/nrn2402
- 967 81. Song I, Savtchenko L, Semyanov A. Tonic excitation or inhibition is set by GABAA  
968 conductance in hippocampal interneurons. *Nat Commun*. 2011;2: 310–376.  
969 doi:10.1038/ncomms1377
- 970 82. Andreozzi E, Carannante I, D’Addio G, Cesarelli M, Balbi P. Phenomenological models of  
971 NaV1.5. A side by side, procedural, hands-on comparison between Hodgkin-Huxley and  
972 kinetic formalisms. *Sci Rep*. 2019;9: 17493. doi:10.1038/s41598-019-53662-9
- 973 83. Milescu LS, Yamanishi T, Ptak K, Smith JC. Kinetic properties and functional dynamics of  
974 sodium channels during repetitive spiking in a slow pacemaker neuron. *J Neurosci*. 2010;30:  
975 12113–12127. doi:10.1523/JNEUROSCI.0445-10.2010
- 976 84. Chizhov A V., Smirnova EY, Kim KK, Zaitsev A V. A simple Markov model of sodium  
977 channels with a dynamic threshold. *J Comput Neurosci*. 2014;37: 181–191.  
978 doi:10.1007/s10827-014-0496-6
- 979

980 **Suppl. Data**

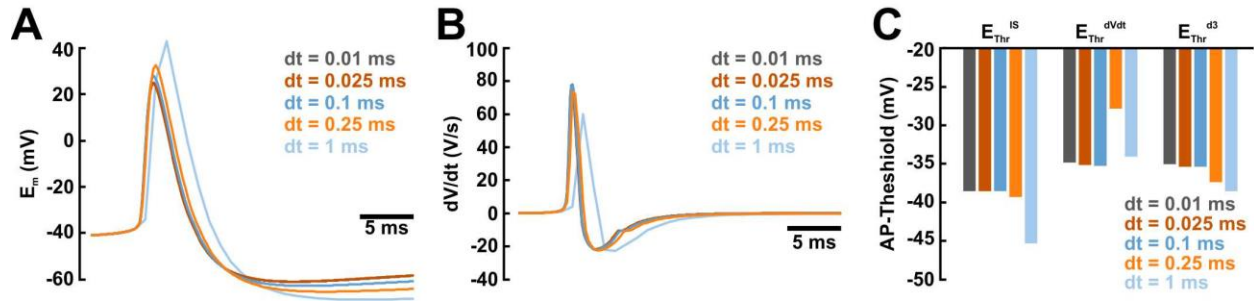

981

982 **Suppl. Fig. 1.** Characterization of AP properties using different  $dt$  values for the simulation. A:  
983 Simulated voltage traces using different  $dt$  as indicated in the plot. Note the divergence of AP  
984 shape at larger  $dt$  values. B: Rate of  $E_m$  changes during an action potential. C: Typical  $E_{AP}^{Thr}$   
985 values determined with 3 different algorithms on the traces obtained at different  $dt$ . Note that  
986 all  $E_{Thr}^{IS}$ ,  $E_{Thr}^{dV/dt}$  and  $E_{Thr}^{d3}$  remained stable for a  $dt \leq 0.1$  ms.

987 **Table 1**

| <b>Phasic GABA - distributed GABA inputs</b> |                        |                      |            |          |                                       |
|----------------------------------------------|------------------------|----------------------|------------|----------|---------------------------------------|
| <b>g<sub>GABA</sub></b>                      | <b>p<sub>Max</sub></b> | <b>E<sub>0</sub></b> | <b>s</b>   | <b>k</b> | <b>E<sub>GABA</sub><sup>Thr</sup></b> |
| 0.0158 pS                                    | 1 pS                   | -36.0 mV             | -20.4 mV   | 0.75     | -43.05 mV                             |
| 0.0789 pS                                    | 1 pS                   | -37.7 mV             | -2.5 mV    | 0.28     | -43.35 mV                             |
| 0.3945 pS                                    | 1 pS                   | -41.6 mV             | -0.47 mV   | 0.21     | -43.06 mV                             |
| <b>Phasic GABA - proximal GABA inputs</b>    |                        |                      |            |          |                                       |
| <b>g<sub>GABA</sub></b>                      | <b>p<sub>Max</sub></b> | <b>E<sub>0</sub></b> | <b>s</b>   | <b>k</b> | <b>E<sub>GABA</sub><sup>Thr</sup></b> |
| 0.0158 pS                                    | 1 pS                   | -38.5 mV             | -19.3 mV   | 0.80     | -43.32 mV                             |
| 0.0789 pS                                    | 1 pS                   | -38.2 mV             | -2.5 mV    | 0.30     | -43.41 mV                             |
| 0.3945 pS                                    | 1 pS                   | -41.8 mV             | -0.49 mV   | 0.24     | -43.12 mV                             |
| <b>Phasic GABA - distal GABA inputs</b>      |                        |                      |            |          |                                       |
| <b>g<sub>GABA</sub></b>                      | <b>p<sub>Max</sub></b> | <b>E<sub>0</sub></b> | <b>s</b>   | <b>k</b> | <b>E<sub>GABA</sub><sup>Thr</sup></b> |
| 0.0158 pS                                    | 1 pS                   | -39.5 mV             | -22.3 mV   | 0.85     | -43.10 mV                             |
| 0.0789 pS                                    | 1 pS                   | -37.5 mV             | -2.8 mV    | 0.30     | -43.34 mV                             |
| 0.3945 pS                                    | 1 pS                   | -41.45 mV            | -0.6 mV    | 0.24     | -43.09 mV                             |
| <b>Tonic GABA</b>                            |                        |                      |            |          |                                       |
| <b>g<sub>GABA</sub></b>                      | <b>p<sub>Max</sub></b> | <b>E<sub>0</sub></b> | <b>s</b>   | <b>k</b> | <b>E<sub>GABA</sub><sup>Thr</sup></b> |
| 0.0875 pS                                    | 1.0 pS                 | -52.70 mV            | -350.00 mV | 1        | -35.90 mV                             |
| 0.1750 pS                                    | 1.0 pS                 | -49.60 mV            | -226.00 mV | 1        | -38.75 mV                             |
| 0.2625 pS                                    | 1.0 pS                 | -47.60 mV            | -148.00 mV | 1        | -40.50 mV                             |
| 0.4375 pS                                    | 1.0 pS                 | -46.10 mV            | -87.00 mV  | 1        | -41.93 mV                             |
| 0.8750 pS                                    | 1.0 pS                 | -44.90 mV            | -39.50 mV  | 1        | -43.00 mV                             |
| 1.7500 pS                                    | 1.0 pS                 | -24.30 mV            | -17.50 mV  | 0.5      | -43.41 mV                             |
| 2.6250 pS                                    | 1.0 pS                 | -32.55 mV            | -10.50 mV  | 0.5      | -43.42 mV                             |
| 4.3750 pS                                    | 1.0 pS                 | -36.95 mV            | -6.20 mV   | 0.45     | -43.59 mV                             |
| 8.7500 pS                                    | 1.0 pS                 | -39.57 mV            | -2.55 mV   | 0.38     | -43.58 mV                             |
| 17.5000 pS                                   | 1.0 pS                 | -41.34 mV            | -1.17 mV   | 0.33     | -43.55 mV                             |
| 26.2500 pS                                   | 1.0 pS                 | -41.78 mV            | -0.74 mV   | 0.29     | -43.41 mV                             |
| 43.7500 pS                                   | 1.0 pS                 | -42.26 mV            | -0.48 mV   | 0.32     | -43.20 mV                             |
| 87.5000 pS                                   | 1.0 pS                 | -42.35 mV            | -0.22 mV   | 0.3      | -42.82 mV                             |

988 *Parameters used for the sigmoidal fit of the E<sub>GABA</sub> to g<sub>GABA</sub><sup>Thr</sup> relationship and the resulting*  
 989 *E<sub>GABA</sub><sup>Thr</sup>.*

990 **Table 2**

| Parameter                         | Value                       | Description                                                                        |
|-----------------------------------|-----------------------------|------------------------------------------------------------------------------------|
| <b>Na<sup>+</sup> Channels</b>    |                             |                                                                                    |
| $G_{c \rightarrow o}^{Na}$        | 0.65                        | Gain for Boltzmann-Function describing the $Na_c \rightarrow Na_o$ transition      |
| $V_{c \rightarrow o}^{Na}$        | -34.9                       | $V_{1/2}$ for Boltzmann-Function describing the $Na_c \rightarrow Na_o$ transition |
| $V_{c \rightarrow o}^{Na}$        | -0.72                       | Slope for Boltzmann-Function describing the $Na_c \rightarrow Na_o$ transition     |
| $G_{o \rightarrow i}^{Na}$        | 0.5                         | Gain for Boltzmann-Function describing the $Na_o \rightarrow Na_i$ transition      |
| $V_{o \rightarrow i}^{Na}$        | -34.9                       | $V_{1/2}$ for Boltzmann-Function describing the $Na_o \rightarrow Na_i$ transition |
| $V_{o \rightarrow i}^{Na}$        | -0.9                        | Slope for Boltzmann-Function describing the $Na_o \rightarrow Na_i$ transition     |
| $\Delta t_{o \rightarrow i}^{Na}$ | 0.51 ms                     | Time delay for the transition to become operational                                |
| $c_{o \rightarrow i}^{dec}$       | 0.1                         | Fraction of constantly decaying $Na_o$ states                                      |
| $G_{i \rightarrow c}^{Na}$        | 0.025                       | Gain for Boltzmann-Function describing the $Na_i \rightarrow Na_c$ transition      |
| $V_{i \rightarrow c}^{Na}$        | -20                         | $V_{1/2}$ for Boltzmann-Function describing the $Na_i \rightarrow Na_c$ transition |
| $V_{i \rightarrow c}^{Na}$        | 2.2                         | Slope for Boltzmann-Function describing the $Na_i \rightarrow Na_c$ transition     |
| $G_{c \rightarrow i}^{Na}$        | 0.0001                      | Gain for Boltzmann-Function describing the $Na_c \rightarrow Na_i$ transition      |
| $V_{c \rightarrow i}^{Na}$        | -40                         | $V_{1/2}$ for Boltzmann-Function describing the $Na_c \rightarrow Na_i$ transition |
| $V_{c \rightarrow i}^{Na}$        | -5                          | Slope for Boltzmann-Function describing the $Na_c \rightarrow Na_i$ transition     |
| $g_{Na}$                          | 0.0035 (S/cm <sup>2</sup> ) | Conductance density for Na <sup>+</sup> channels in the soma                       |
| $E_{Na}$                          | 66 (mV)                     | Reversal potential for Na <sup>+</sup> currents                                    |
| <b>K<sup>+</sup> Channels</b>     |                             |                                                                                    |
| $G_{c \rightarrow o}^K$           | 1.15                        | Gain for Boltzmann-Function describing the $K_c \rightarrow K_o$ transition        |
| $V_{c \rightarrow o}^K$           | -10                         | $V_{1/2}$ for Boltzmann-Function describing the $K_c \rightarrow K_o$ transition   |
| $V_{c \rightarrow o}^K$           | -2                          | Slope for Boltzmann-Function describing the $K_c \rightarrow K_o$ transition       |
| $\Delta t_{oci}^K$                | 0.55 ms                     | Time delay for the transition to become operational                                |
| $G_{o \rightarrow c}^K$           | 0.055                       | Gain for Boltzmann-Function describing the $K_o \rightarrow K_i$ transition        |
| $V_{o \rightarrow c}^K$           | -10                         | $V_{1/2}$ for Boltzmann-Function describing the $K_o \rightarrow K_i$ transition   |
| $V_{o \rightarrow c}^K$           | 1                           | Slope for Boltzmann-Function describing the $K_o \rightarrow K_i$ transition       |
| $\Delta t_{oci}^K$                | 1.7 ms                      | Time delay for the transition to become operational                                |
| $g_K$                             | 0.0006 (S/cm <sup>2</sup> ) | Conductance density for K <sup>+</sup> channels in the soma                        |
| $E_K$                             | -84 (mV)                    | Reversal potential for K <sup>+</sup> currents                                     |

991 *Parameters used for the modified Markov model.*
